# Supplementary material for: Facile synthesis, structure and properties of CO2-sourced poly(thioether-co-carbonate)s containing acetyl pendants via thio-ene click polymerization
Source: Royal Society of Chemistry journal article supplement (doi:10.1039/d1py01477c), 2021-12-07
Supplement: d1py01477c1.pdf [file d1py01477c1.pdf]

## ELECTRONIC SUPPLEMENTARY INFORMATION

### Facile Synthesis, Structure and Properties of CO<sub>2</sub>-sourced Poly(thioether-co-carbonate)s Containing Acetyl Pendants via Thio-Ene Click Polymerization

Yi-Feng Zhang,<sup>[a]</sup> Wei-Ming Lai,<sup>[b]</sup> Sheng Xie,<sup>[b]</sup> Hui Zhou<sup>\*[a]</sup> and Xiao-Bing Lu<sup>[a]</sup>

<sup>[a]</sup> \*State Key Laboratory of Fine Chemicals, Dalian University of Technology, Dalian 116024, China.

<sup>[b]</sup> State Key Laboratory of Chemo/Biosensing and Chemometrics, College of Chemistry and Chemical Engineering, Hunan University, 410082 Changsha, China

E-mail: [zhouhui@dlut.edu.cn](mailto:zhouhui@dlut.edu.cn)

|                                                                                    |     |
|------------------------------------------------------------------------------------|-----|
| 1. Synthesis of polymeric monomers .....                                           | S2  |
| 2. Optimization of polymerization conditions.....                                  | S3  |
| 3. Synthesis of polymers via thiol-ene click reaction.....                         | S4  |
| 4. Degradation reaction of monomer <b>4</b> via cascade reaction.....              | S8  |
| 5. Degradation reaction of polymers <b>P-4b5a</b> via cascade reaction .....       | S9  |
| 6. GPC curves of the polymers <b>P45</b> and degradable polymer <b>D-P45</b> ..... | S11 |
| 8. FT-IR spectra.....                                                              | S16 |
| 8. NMR spectra.....                                                                | S19 |
| 9. ESI MS spectra.....                                                             | S34 |
| 10. Fluorescence spectra.....                                                      | S36 |
| 11. Transient photoluminescence decay curve .....                                  | S37 |
| 12. References .....                                                               | S39 |

## 1. Synthesis of polymeric monomers

4-Methyl-4-vinyl-5-methylene-1,3-dioxolan-2-one (**2**) was synthesized by the carboxylative cyclization of propargylic alcohol (**1**) with CO<sub>2</sub> according to previous literatures.<sup>1</sup>

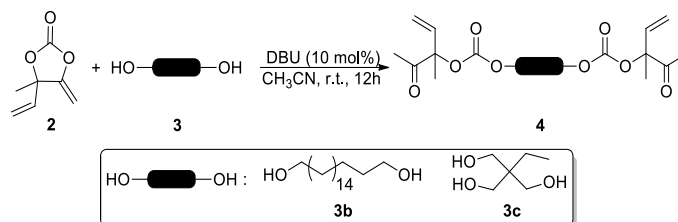

**Figure S1.** Synthesis of 4-methyl-4-vinyl-5-methylene-1,3-dioxolan-2-one (**2**) with diol **3**.

4-Vinyl substituted  $\alpha$ CC **2** (10 mmol), 1,18-octadecanediol (**3b**, 5 mmol) and CH<sub>3</sub>CN (20.0 mL) were added successively into a 100 mL flask equipped with a magnetic stirrer. Then 1,8-diazabicyclo[5.4.0]undec-7-ene (DBU, 0.5 mmol, 10 mol%) was introduced and the mixture was stirred for 12 h at room temperature. After the reaction was over, the solvent was removed by rotary evaporation. The resulting crude mixture was purified by flash column chromatograph on silica gel to afford monomer **4b** (white solid, isolated yield: 75%). **<sup>1</sup>H NMR (600 MHz, CDCl<sub>3</sub>)**  $\delta$  6.01 (dd,  $J = 17.4, 11.0$  Hz, 2H), 5.44 (d,  $J = 17.4$  Hz, 2H), 5.30 (d,  $J = 11.0$  Hz, 2H), 4.14 (d,  $J = 6.7, 2.0$  Hz, 4H), 2.14 (s, 6H), 1.70 – 1.64 (m, 4H), 1.60 (s, 6H), 1.38 – 1.21 (m, 28H). **<sup>13</sup>C NMR (150 MHz, CDCl<sub>3</sub>)**  $\delta$  204.2, 153.9, 135.9, 117.0, 87.4, 77.3, 77.1, 76.9, 68.7, 29.8, 29.7, 29.7, 29.6, 29.6, 29.3, 28.7, 25.7, 23.7, 21.3. **IR(KBr):**  $\nu = 3432, 2924, 2853, 1745(\text{C}=\text{O}), 1728(\text{C}=\text{O}), 1677, 1633, 1462, 1391, 1370, 1356, 1275, 1181, 1123, 1050, 993, 932, 790, 617$  cm<sup>-1</sup>. **HRMS:**  $m/z$  calculated for C<sub>32</sub>H<sub>54</sub>O<sub>8</sub>[M+Na<sup>+</sup>]:589.3716; found 589.3690.

4-Vinyl substituted  $\alpha$ CC **2** (15 mmol), trimethylolpropane (**3c**, 5 mmol) and CH<sub>3</sub>CN (20.0 mL) were added successively into a 100 mL flask equipped with a magnetic stirrer. Then 1,8-diazabicyclo[5.4.0]undec-7-ene (DBU, 0.5 mmol, 10 mol%) was introduced and the mixture was stirred for 12 h at room temperature. After the reaction was over, the solvent was removed by rotary evaporation. The resulting crude mixture was purified by flash column chromatograph on silica gel to afford monomer **4c** (coreless oil, isolated yield: 71%). **<sup>1</sup>H NMR (600 MHz, CDCl<sub>3</sub>)**  $\delta$  5.98 (dd,  $J = 17.4, 11.0$  Hz, 3H), 5.40 (d,  $J = 17.4$  Hz, 3H), 5.29 (d,  $J = 11.0$  Hz, 3H), 4.12 (s, 7H), 2.10 (s, 9H), 1.58 (s, 9H), 1.52 (q,  $J = 7.5$  Hz, 2H), 0.91 (t,  $J = 7.5$  Hz, 3H). **<sup>13</sup>C NMR (150 MHz, CDCl<sub>3</sub>)**  $\delta$  203.6, 153.5, 135.6, 117.3, 87.8, 77.3, 77.1, 76.9, 67.0, 41.5, 23.7, 22.4, 21.1, 7.2. **IR(KBr):**

$\nu=3435, 2973, 2943, 1747(\text{C}=\text{O}), 1726(\text{C}=\text{O}), 1639, 1458, 1393, 1356, 1267, 1180, 1102, 1081, 988, 937, 904, 791, 661 \text{ cm}^{-1}$ . **HRMS**:  $m/z$  calculated for  $\text{C}_{27}\text{H}_{38}\text{O}_{12}[\text{M}+\text{Na}^+]$ : 577.2261; found 577.2258.

## 2. Optimization of polymerization conditions

To a Schlenk tube, 1,3-dimercaptopropane (**5a**, 1.0 mmol), **4a** (1.0 mmol), [Ir (4,4'-*t*Bu<sub>2</sub>-bpy)(bpy)<sub>2</sub>]PF<sub>6</sub> (**[Ir]**, 0.05 mmol, 5.0 mol%), *p*-Toluidine (0.05 mmol, 5.0 mol%) were added, following by the addition of 1-methyl-2-pyrrolidinone (NMP) (1.0 mL). The Schlenk tube was irradiated with a 450 nm LED for 24 h. After that, a small amount of the crude product was taken to determine monomer conversion by <sup>1</sup>H NMR spectrum. The remaining product was repeatedly dissolved in CH<sub>2</sub>Cl<sub>2</sub>, precipitated with cold methanol, isolated by centrifuge, and dried under vacuum at 35 °C for 24 h to afford polymer **P4a5a** (light yellow sticky liquid, 84% yield.).

**Table S1.** Optimization of reaction conditions for the synthesis of polymers.

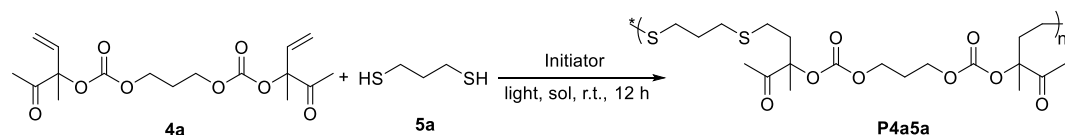

| Entry          | Polymer      | Solvent | Initiator<br>(5 mol%)     | $M_n$<br>(g/mol) <sup>e</sup> | Conv.<br>(%) <sup>f</sup> | $D^e$ |
|----------------|--------------|---------|---------------------------|-------------------------------|---------------------------|-------|
| 1 <sup>a</sup> | <b>P4a5a</b> | THF     | DMPA                      | 5900                          | >99%                      | 2.12  |
| 2 <sup>b</sup> | <b>P4a5a</b> | THF     | [Ir]+ <i>p</i> -Toluidine | 7800                          | 90%                       | 1.46  |
| 3              | <b>P4a5a</b> | DMF     | [Ir]+ <i>p</i> -Toluidine | 5100                          | >99%                      | 1.37  |
| 4              | <b>P4a5a</b> | NMP     | [Ir]+ <i>p</i> -Toluidine | 7800                          | >99%                      | 1.37  |
| 5 <sup>b</sup> | <b>P4a5a</b> | NMP     | [Ir]+ <i>p</i> -Toluidine | 10400                         | >99%                      | 1.43  |
| 6 <sup>c</sup> | <b>P4a5a</b> | NMP     | [Ir]+ <i>p</i> -Toluidine | 5300                          | >99%                      | 1.45  |
| 7 <sup>d</sup> | <b>P4a5a</b> | NMP     | [Ir]+ <i>p</i> -Toluidine | 4800                          | 89%                       | 1.32  |
| 8              | <b>P4a5a</b> | NMP     | [Ir]                      | 4500                          | >99%                      | 1.48  |

[a]. 365 nm. [b]. 24 h. [c]. Initiator = 10 mol%. [d]. Initiator = 1 mol%. [e]. Molecular weights were measured by GPC. [f]. Conversions was determined by <sup>1</sup>H-NMR spectroscopy on the crude samples. **[Ir]** = [Ir (4,4'-*t*Bu<sub>2</sub>-bpy)(bpy)<sub>2</sub>]PF<sub>6</sub> (*t*Bu: *tert*-butyl). 2,2-Dimethoxy-2-phenyl acetophenone (DMPA).

### 3. Synthesis of polymers via thiol-ene click reaction

#### 3.1 Synthesis of polymer P4a5

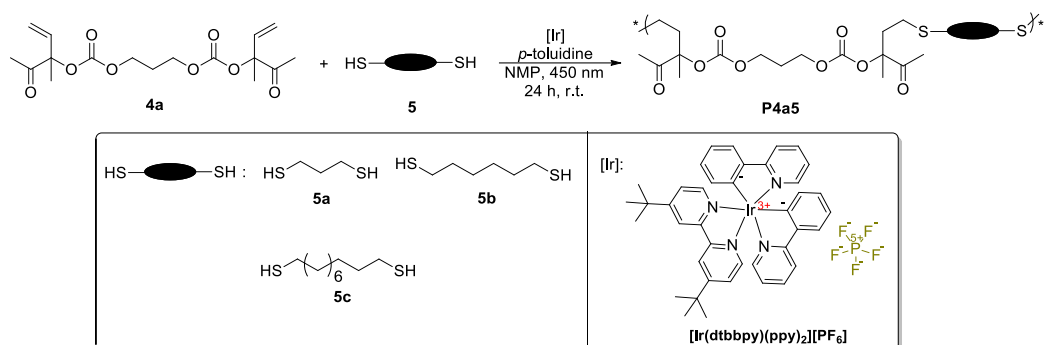

Figure S2. Synthesis of P4a5 from 4a and dithiol 5.

To a Schlenk tube, dithiol (**5**, 1.0 mmol), **4a** (1.0 mmol), [Ir (4,4'-<sup>t</sup>Bu<sub>2</sub>-bpy)(ppy)<sub>2</sub>][PF<sub>6</sub>] (**[Ir]**, 0.05 mmol, 5.0 mol%), *p*-toluidine (0.05 mmol, 5.0 mol%) were added, following by the addition of 1.0 mL of 1-methyl-2-pyrrolidinone (NMP). The Schlenk tube was irradiated with a 450 nm LED for 24 h. After that, a small amount of the crude product was taken to determine monomer conversion by <sup>1</sup>H NMR spectrum. The remaining product was repeatedly dissolved in CH<sub>2</sub>Cl<sub>2</sub>, precipitated with cold methanol, isolated by centrifuge, and dried under vacuum at 35 °C for 24 h to afford polymer **P4a5**.

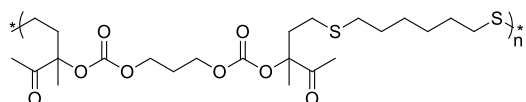

**P4a5b** (light yellow sticky liquid. 82% yield.)  $M_n = 9300$  g/mol. PDI = 1.43. <sup>1</sup>H NMR (600 MHz, CDCl<sub>3</sub>) δ 4.23 (t, *J* = 6.1 Hz, 4H), 2.55 – 2.39 (m, 8H), 2.25 – 2.11 (m, 8H), 2.03 (m, 4H), 1.63 – 1.49 (m, 10H), 1.37 (s, 4H). <sup>13</sup>C NMR (150 MHz, CDCl<sub>3</sub>) δ 205.9, 153.7, 87.4, 77.3, 77.1, 76.9, 64.5, 36.9, 32.2, 29.4, 28.5, 28.2, 25.8, 24.4, 20.5. IR(KBr): ν=2927, 2854, 1746(C=O), 1721(C=O), 1461, 1379, 1360, 1331, 1268, 1165, 1102, 1072, 1032, 913, 791 cm<sup>-1</sup>.

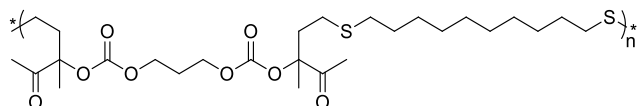

**P4a5c** (light yellow sticky liquid. 87% yield.)  $M_n = 14700$  g/mol. PDI = 1.37. <sup>1</sup>H NMR (600 MHz, CDCl<sub>3</sub>) δ 4.23 (t, *J* = 6.1 Hz, 4H), 2.58 – 2.38 (m, 8H), 2.23 – 2.12 (m, 8H), 2.03 (m, 4H), 1.54 (d, *J* = 13.5 Hz, 10H), 1.35 (s, 4H), 1.26 (s, 10H). <sup>13</sup>C NMR (150 MHz, CDCl<sub>3</sub>) δ 205.9, 153.7, 87.5, 77.4, 77.1, 76.8, 64.5, 36.9, 32.3, 29.6, 29.6, 29.3, 29.0, 28.2, 25.8, 24.4, 20.5. IR(KBr):

$\nu=3433, 2925, 2853, 1743(\text{C}=\text{O}), 1715(\text{C}=\text{O}), 1459, 1399, 1358, 1332, 1265, 1165, 1102,$   
 $1071, 914, 871, 792 \text{ cm}^{-1}$ .

### 3.2 Synthesis of polymer **P4b5**

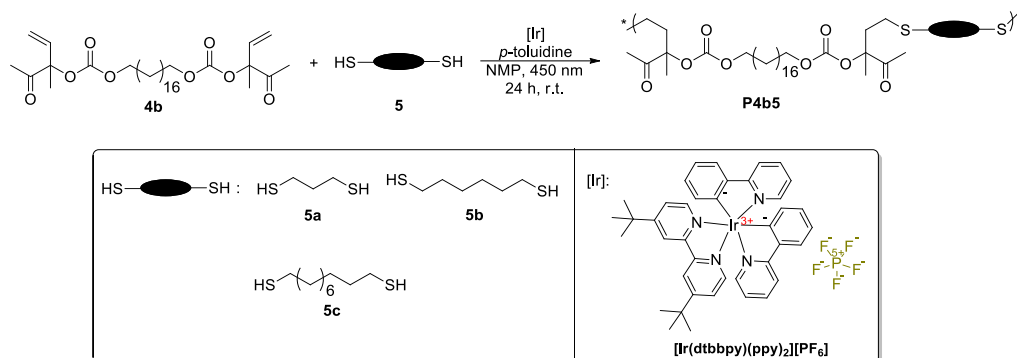

**Figure S3.** Synthesis of **P4b5** from **4b** and dithiol **5**.

To a Schlenk tube, dithiol (**5**, 1.0 mmol), **4b** (1.0 mmol), [Ir (4,4'-<sup>t</sup>Bu<sub>2</sub>-bpy)(bpy)<sub>2</sub>][PF<sub>6</sub>] (**[Ir]**, 0.05 mmol, 5.0 mol%), *p*-toluidine (0.05 mmol, 5.0 mol%) were added, following by the addition of 1.0 mL of 1-methyl-2-pyrrolidinone (NMP). The Schlenk tube was irradiated with a 450 nm LED for 24 h. After that, a small amount of the crude product was taken to determine monomer conversion by <sup>1</sup>H NMR spectrum. The remaining product was repeatedly dissolved in CH<sub>2</sub>Cl<sub>2</sub>, precipitated with cold methanol, isolated by centrifuge, and dried under vacuum at 35 °C for 24 h to afford polymer **P4b5**.

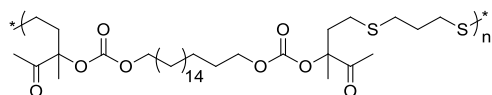

**P4b5a** (light yellow solid. 85% yield.)  $M_n = 12500 \text{ g/mol}$ . PDI = 1.14. <sup>1</sup>H NMR (600 MHz, CDCl<sub>3</sub>)  $\delta$  4.12 (t,  $J = 6.8 \text{ Hz}$ , 4H), 2.60 (dd,  $J = 13.8, 6.8 \text{ Hz}$ , 4H), 2.50 (m, 4H), 2.23 – 2.11 (m, 10H), 2.03 (m, 2H), 1.73 – 1.62 (m, 4H), 1.54 (s, 6H), 1.25 (s, 28H). <sup>13</sup>C NMR (150 MHz, CDCl<sub>3</sub>)  $\delta$  206.2, 153.9, 87.2, 77.3, 77.1, 76.9, 68.6, 36.8, 32.2, 29.8, 29.7, 29.7, 29.6, 29.4, 29.3, 28.76, 28.5, 25.8, 25.7, 24.3, 20.4. IR(KBr):  $\nu=3430, 2927, 2853, 1746(\text{C}=\text{O}), 1720(\text{C}=\text{O}), 1463, 1394, 1356,$   
 $1276, 1166, 1101, 1075, 915, 793 \text{ cm}^{-1}$ .

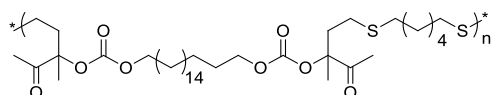

**P4b5b** (light yellow solid. 81% yield.)  $M_n = 16700 \text{ g/mol}$ . PDI = 1.35. <sup>1</sup>H NMR (600 MHz, CDCl<sub>3</sub>)  $\delta$  4.12 (t,  $J = 6.4 \text{ Hz}$ , 4H), 2.73 – 2.60 (m, 2H), 2.55 – 2.42 (m, 6H), 2.17 (s, 6H), 2.08 –

1.95 (m, 2H), 1.72 – 1.62 (m, 6H), 1.62 – 1.51 (m, 10H), 1.24 (s, 32H).  $^{13}\text{C}$  NMR (150 MHz,  $\text{CDCl}_3$ )  $\delta$  206.2, 153.9, 87.1, 77.3, 77.1, 76.9, 68.7, 36.8, 32.2, 29.8, 29.7, 29.7, 29.6, 29.4, 29.3, 28.7, 28.5, 25.8, 25.7, 24.3, 20.4. IR(KBr):  $\nu=3425, 2923, 2853, 1743(\text{C}=\text{O}), 1723(\text{C}=\text{O}), 1465, 1398, 1358, 1277, 1168, 1130, 1104, 1077, 1029, 917, 792\text{ cm}^{-1}$ .

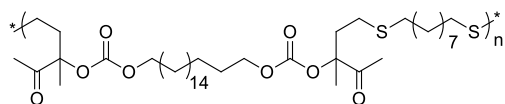

**P4b5c** (light yellow solid. 89% yield.)  $M_n = 23900\text{ g/mol}$ . PDI = 2.15.  $^1\text{H}$  NMR (600 MHz,  $\text{CDCl}_3$ )  $\delta$  4.12 (t,  $J = 6.8\text{ Hz}$ , 4H), 2.59 – 2.39 (m, 8H), 2.24 – 2.10 (m, 8H), 2.03 (m, 2H), 1.67 (m, 4H), 1.57 – 1.52 (m, 10H), 1.38 – 1.30 (m, 8H), 1.26 (d,  $J = 6.5\text{ Hz}$ , 32H), 1.24 – 1.24 (m, 1H).  $^{13}\text{C}$  NMR (150 MHz,  $\text{CDCl}_3$ )  $\delta$  206.3, 153.9, 87.1, 68.7, 36.8, 32.3, 29.8, 29.8, 29.7, 29.6, 29.6, 29.3, 29.0, 28.7, 25.8, 25.7, 24.3, 20.4. IR(KBr):  $\nu=3428, 2922, 2853, 1744(\text{C}=\text{O}), 1724(\text{C}=\text{O}), 1463, 1393, 1356, 1276, 1165, 1073, 916, 793\text{ cm}^{-1}$ .

### 3.3 Synthesis of polymer **P4c5**

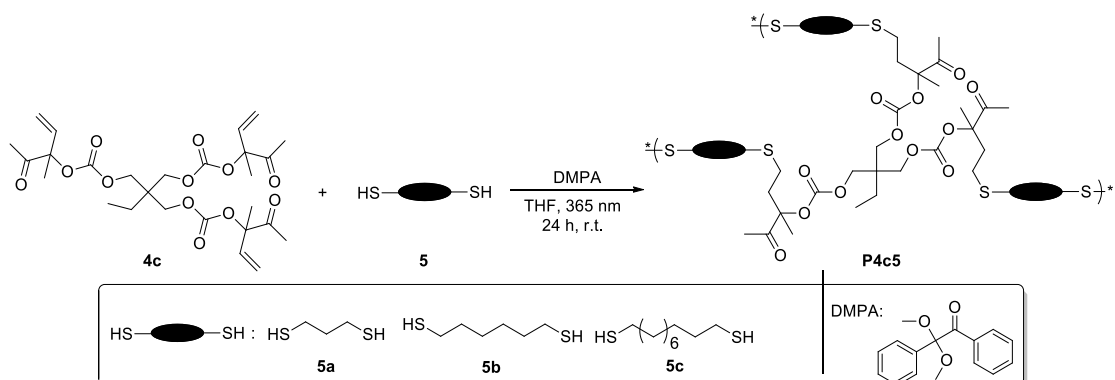

**Figure S4.** Synthesis of **P4c5** from **4c** and dithiol **5**.

To a Schlenk tube, dithiol (**5**, 1.5 mmol), **4c** (1.0 mmol) and benzoin dimethyl ether (DMPA 0.05 mmol, 5.0 mol%) were added, following by the addition of THF (1.0 mL). The Schlenk tube was irradiated with a 365 nm LED for 24 h. After that, a small amount of the crude product was taken to determine monomer conversion by  $^1\text{H}$  NMR spectrum. The remaining product was repeatedly dissolved in  $\text{CH}_2\text{Cl}_2$ , precipitated with cold methanol, isolated by centrifuge, and dried under vacuum at 35 °C for 24 h to afford polymer **P4c5**.

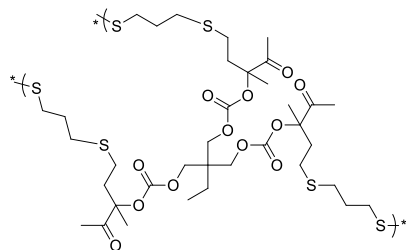

**P4c5a** (colorless sticky liquid. 86% yield.)  $M_n = 6600$  g/mol. PDI = 1.83.  $^1\text{H NMR}$  (600 MHz,  $\text{CDCl}_3$ )  $\delta$  4.12 (s, 6H), 2.69 – 2.56 (m, 8H), 2.56 – 2.41 (m, 6H), 2.17 (d,  $J = 1.2$  Hz, 9H), 2.04 (m, 4H), 1.85 (m, 4H), 1.56 (s, 9H), 1.56 (s, 8H), 1.54 (s, 2H), 0.94 (t,  $J = 7.5$  Hz, 3H).  $^{13}\text{C NMR}$  (150 MHz,  $\text{CDCl}_3$ )  $\delta$  205.7, 153.6, 87.6, 77.3, 77.1, 76.9, 67.0, 41.6, 36.9, 36.7, 33.3, 31.0, 30.5, 29.0, 25.8, 25.7, 24.5, 23.5, 22.4, 20.5, 20.5, 7.4. **IR(KBr)**:  $\nu=3453, 2972, 2936, 1746$  (C=O), 1721 (C=O), 1461, 1380, 1358, 1267, 1165, 1102, 1074, 963, 918, 788  $\text{cm}^{-1}$ .

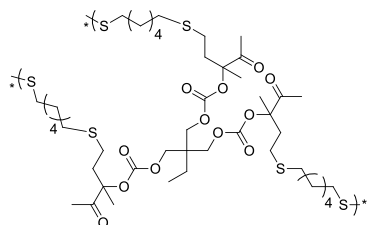

**P4c5b** (colorless sticky liquid. 82% yield.)  $M_n = 6300$  g/mol. PDI = 2.27.  $^1\text{H NMR}$  (600 MHz,  $\text{CDCl}_3$ )  $\delta$  4.11 (s, 6H), 2.60 – 2.37 (m, 14H), 2.17 (s, 9H), 2.09 – 1.94 (m, 3H), 1.74 – 1.45 (m, 26H), 1.47 – 1.34 (m, 10H), 0.93 (t,  $J = 7.5$  Hz, 3H).  $^{13}\text{C NMR}$  (150 MHz,  $\text{CDCl}_3$ )  $\delta$  205.7, 153.6, 87.6, 77.3, 77.1, 76.9, 67.0, 41.6, 36.9, 36.8, 33.9, 32.3, 32.2, 29.4, 29.4, 28.6, 28.3, 28.0, 25.85, 25.8, 24.6, 24.4, 22.4, 20.4, 20.4, 7.4. **IR(KBr)**:  $\nu=3474, 2929, 2855, 1804, 1746$  (C=O), 1721 (C=O), 1461, 1395, 1357, 1266, 1164, 1102, 1074, 962, 917, 789, 734  $\text{cm}^{-1}$ .

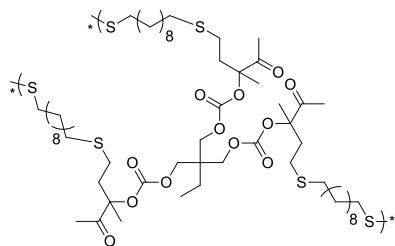

**P4c5c** (colorless sticky liquid. 85% yield.)  $M_n = 6800$  g/mol. PDI = 1.85.  $^1\text{H NMR}$  (600 MHz,  $\text{CDCl}_3$ )  $\delta$  4.11 (s, 6H), 2.56 – 2.39 (m, 14H), 2.16 (s, 9H), 2.09 – 1.95 (m, 3H), 1.60 (d,  $J = 5.1$  Hz, 6H), 1.58 – 1.48 (m, 18H), 1.43 – 1.20 (m, 31H), 0.92 (t,  $J = 7.5$  Hz, 3H).  $^{13}\text{C NMR}$  (150 MHz,  $\text{CDCl}_3$ )  $\delta$  205.7, 153.6, 87.6, 77.4, 77.1, 76.8, 66.9, 41.6, 36.9, 34.1, 32.3, 32.3, 29.6, 29.6, 29.5,

29.3, 29.3, 29.1, 29.0, 28.9, 28.4, 25.8, 24.7, 24.3, 22.4, 20.4, 7.4. **IR(KBr)**:  $\nu=3461, 2925, 2853, 1746(\text{C}=\text{O}), 1723(\text{C}=\text{O}), 1462, 1391, 1357, 1266, 1165, 1072, 962, 917, 788\text{ cm}^{-1}$ .

#### 4. Degradation of monomers 4 via cascade reaction

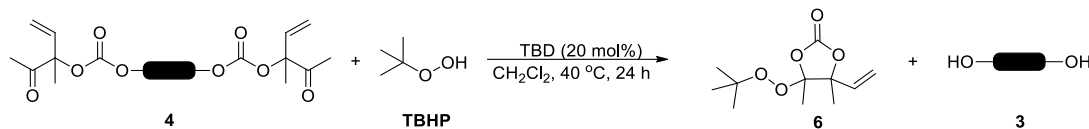

**Figure S5.** Degradation reaction of monomers 4.

To a 2 mL high-pressure tube, monomer (**4**, 1.0 mmol), *tert*-butyl hydroperoxide (5.5 mmol/mL in decane) (TBHP, 2.0 mmol, 2.0 equiv.), 1,5,7-triazabicyclo[4.4.0]dec-5-ene (TBD, 20 mol%) and  $\text{CH}_2\text{Cl}_2$  (0.5 mL) were added. Then the mixture was stirred for 24 h at 40 °C. The reaction solution was cooled to room temperature, and the solvent was removed by rotary evaporation. Two isomers (*E* and *Z*) could be purified and isolated by flash column chromatograph as a colorless oil.

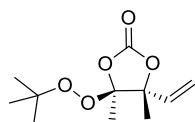

(*E*)-Isomer **6a** (colorless oil, 48% yield).  **$^1\text{H}$  NMR (600 MHz,  $\text{CDCl}_3$ )**  $\delta$  5.79 (dd,  $J = 17.1, 10.8$  Hz, 1H), 5.42 (d,  $J = 17.1$  Hz, 1H), 5.29 (d,  $J = 10.8$  Hz, 1H), 1.62 (s, 3H), 1.51 (s, 3H), 1.27 (s, 9H).  **$^{13}\text{C}$  NMR (150 MHz,  $\text{CDCl}_3$ )**  $\delta$  153.4, 136.4, 116.1, 110.0, 87.8, 82.3, 26.4, 18.3, 17.9. **IR(KBr)**:  $\nu=2987, 1813(\text{C}=\text{O}), 1366, 1265, 1195, 1179, 1158, 1141, 1115, 1067, 1025, 1009, 932, 891, 863, 767\text{ cm}^{-1}$ . **HRMS**:  $m/z$  calculated for  $\text{C}_{11}\text{H}_{18}\text{O}_5$  [ $\text{M}+\text{NH}_4^+$ ]: 248.1498; found 248.1492.

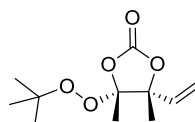

(*Z*)-Isomer **6b** (colorless oil, 48% yield).  **$^1\text{H}$  NMR (600 MHz,  $\text{CDCl}_3$ )**  $\delta$  6.15 (dd,  $J = 17.5, 11.1$  Hz, 1H), 5.43 (d,  $J = 17.5$  Hz, 1H), 5.35 (d,  $J = 11.1$  Hz, 1H), 1.57 (s, 3H), 1.49 (s, 3H), 1.24 (s, 9H).  **$^{13}\text{C}$  NMR (150 MHz,  $\text{CDCl}_3$ )**  $\delta$  153.3, 133.3, 117.9, 110.3, 88.0, 82.1, 26.4, 22.7, 16.6. **IR(KBr)**:  $\nu=2984, 1812(\text{C}=\text{O}), 1386, 1366, 1263, 1219, 1193, 1108, 1058, 1024, 935\text{ cm}^{-1}$ . **HRMS**:  $m/z$  calculated for  $\text{C}_{11}\text{H}_{18}\text{O}_5$  [ $\text{M}+\text{NH}_4^+$ ]: 248.1498; found 248.1493. All the resonances in  $^1\text{H}$  and  $^{13}\text{C}$  NMR spectra were in good agreement with literature values.<sup>2</sup>



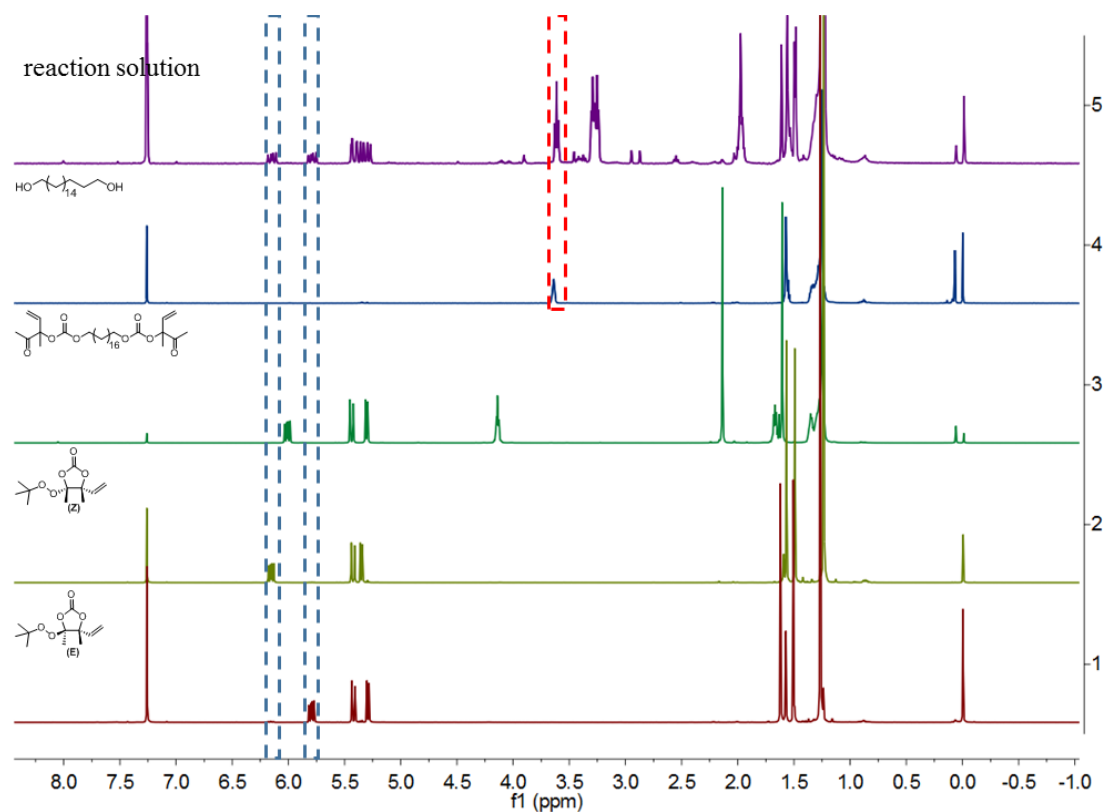

**Figure S6.** Stacked  $^1\text{H}$  NMR spectra of the selective depolymerisation of **4b**.

## 5. Degradation of polymer **P-4b5a** via cascade reaction

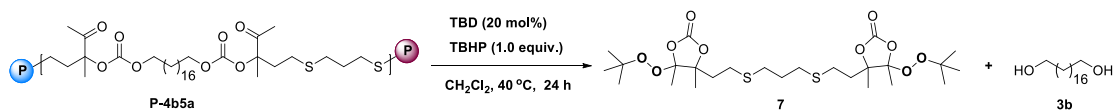

**Figure S7.** Degradation of polymer **P-4b5a**.

### 5.1 Degradation of **P4b5a** via cascade reaction

To a 2 mL high-pressure tube, **P4b5a** (175 mg, 0.254 mmol), *tert*-butyl hydroperoxide (5.5 mmol/mL in decane, 0.508 mmol, 45 mg, 0.1 mL), 1,5,7-triazabicyclo[4.4.0]dec-5-ene (TBD, 0.05 mmol, 20 mol%, 6,96 mg) and  $\text{CH}_2\text{Cl}_2$  (0.5 mL) were added. Then the mixture was stirred for 24 h at 40 °C. The reaction solution was cooled to room temperature. The solution was then evaporated to a minimum amount by evaporation, dissolved with a small amount of  $\text{CH}_2\text{Cl}_2$  precipitated in hexane, and the product was isolated by centrifuge. Repeated the above steps twice, and vacuum-dried to obtain **3b** (white solid, 65% yield).  $^1\text{H}$  NMR (600 MHz,  $\text{CDCl}_3$ )  $\delta$  3.64 (d,  $J$  = 3.6 Hz, 4H), 1.60 – 1.53 (m, 4H), 1.36 – 1.23 (m, 28H), 1.21 (s, 2H).  $^{13}\text{C}$  NMR (150 MHz,  $\text{CDCl}_3$ )  $\delta$  62.8, 32.8,

29.4, 25.6. All the resonances in  $^1\text{H}$  and  $^{13}\text{C}$  NMR spectra were in good agreement with literature values.<sup>3</sup> Then the filtrate was removed by rotary evaporation. The resulting crude mixture was purified by flash column chromatograph on silica gel to afford **7** (colorless oil, 13% yield).  $^1\text{H}$  NMR (400 MHz,  $\text{CDCl}_3$ )  $\delta$  2.66 (t,  $J = 7.0$  Hz, 4H), 2.64 – 2.56 (m, 4H), 2.38 (m, 2H), 2.18 – 1.94 (m, 4H), 1.94 – 1.84 (m, 2H), 1.56 (s, 6H), 1.40 (s, 6H), 1.26 (s, 19H).  $^{13}\text{C}$  NMR (100 MHz,  $\text{CDCl}_3$ )  $\delta$  152.9, 110.2, 87.9, 82.3, 77.4, 77.1, 76.8, 33.5, 30.9, 29.0, 26.5, 26.4, 22.5, 17.2. IR(KBr):  $\nu=2924$ , 1809(C=O), 1630, 1401, 1366, 1248, 1189, 1146, 1045, 1006, 963, 927, 892, 771.05, 729, 519  $\text{cm}^{-1}$ . HRMS:  $m/z$  calculated for  $\text{C}_{25}\text{H}_{44}\text{O}_{10}\text{S}_2$  [ $\text{M}+\text{Na}^+$ ]: 591.2274; found 591.2283.

## 5.2 The depolymerization reaction of **P4b5a** were detected by means of In-situ FT-IR

To a 10 mL flask, equipped with a magnetic stir bar, was charged with **P4b5a** (175 mg, 0.254 mmol), *tert*-butyl hydroperoxide (5.5 mmol/mL in decane, 0.1 mL, 2.0 equiv.), 1,5,7-triazabicyclo[4.4.0]dec-5-ene (TBD, 0.05 mmol, 20 mol%) and  $\text{CH}_2\text{Cl}_2$  (0.5 mL), then in-situ FT-IR probe was equipped to check the IR signals. Then the mixture was stirred for 24 h at 40 °C.

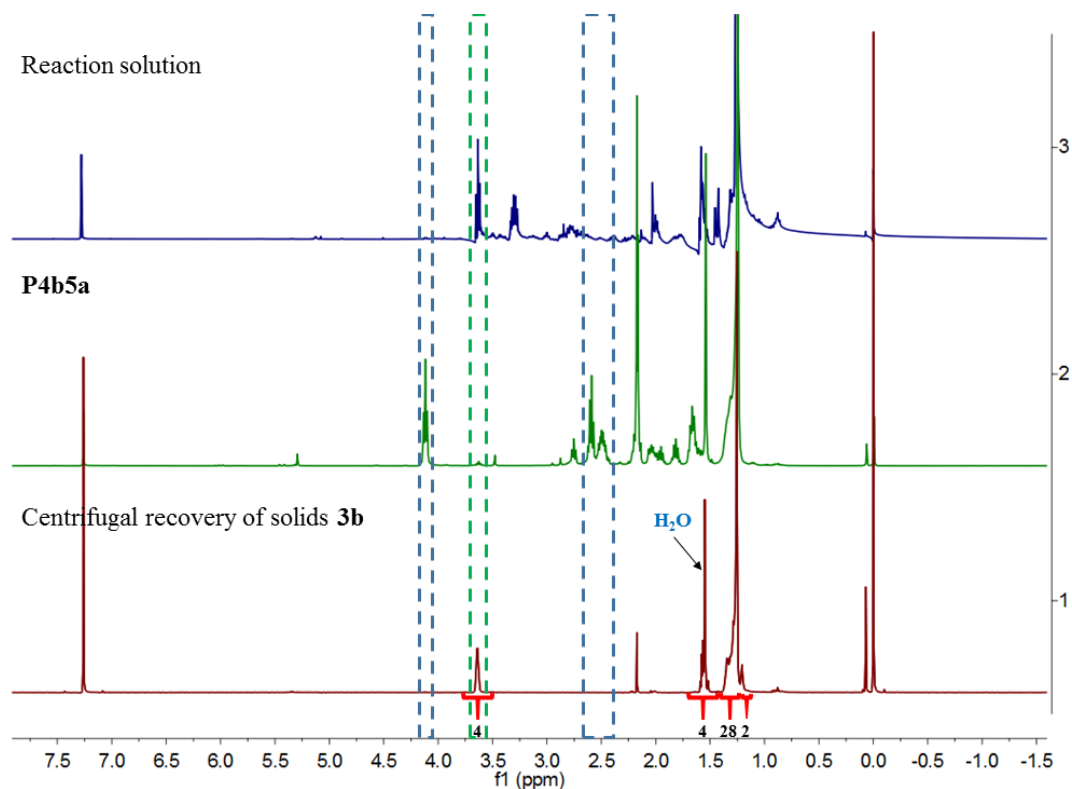

**Figure S8.** Stacked  $^1\text{H}$  NMR spectra of the selective depolymerization of **P4b5a**.

## 6. GPC curves of the polymers P45 and degradable polymer D-P45

**Table S2.** GPC comparison of polymers **P45** and degradable polymers **D-P45**.

| Entry | Polymer      | $M_n$ (g/mol) <sup>a</sup> | D-Polymer      | $M_n'$ (g/mol) <sup>a</sup> |
|-------|--------------|----------------------------|----------------|-----------------------------|
| 1     | <b>P4a5a</b> | 10400                      | <b>D-P4a5a</b> | 298                         |
| 2     | <b>P4a5b</b> | 9300                       | <b>D-P4a5b</b> | 311                         |
| 3     | <b>P4a5c</b> | 14700                      | <b>D-P4a5c</b> | 626                         |
| 4     | <b>P4b5a</b> | 12500                      | <b>D-P4b5a</b> | 1100                        |
| 5     | <b>P4b5b</b> | 16700                      | <b>D-P4b5b</b> | 1300                        |
| 6     | <b>P4b5c</b> | 23900                      | <b>D-P4b5c</b> | 979                         |
| 7     | <b>P4c5a</b> | 6600                       | <b>D-P4c5a</b> | 417                         |
| 8     | <b>P4c5b</b> | 6300                       | <b>D-P4c5b</b> | 339                         |
| 9     | <b>P4c5c</b> | 6800                       | <b>D-P4c5c</b> | 373                         |

[a]. Number average molecular weights ( $M_n$ ) were determined by gel permeation chromatography in THF, calibrated with polystyrene.

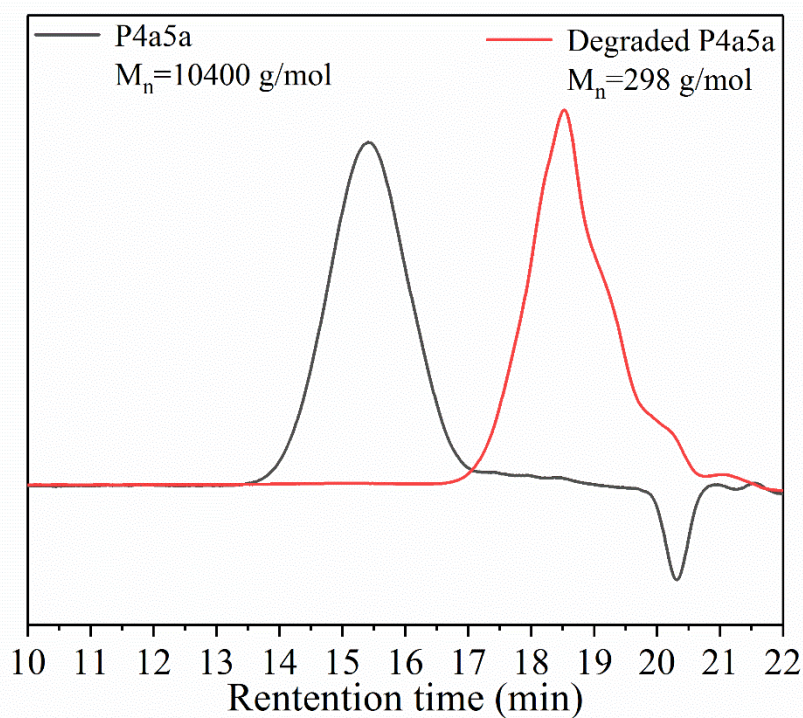

**Figure S9.** GPC curves of polymer **P-4a5a** and degraded polymer **D-P4a5a**.

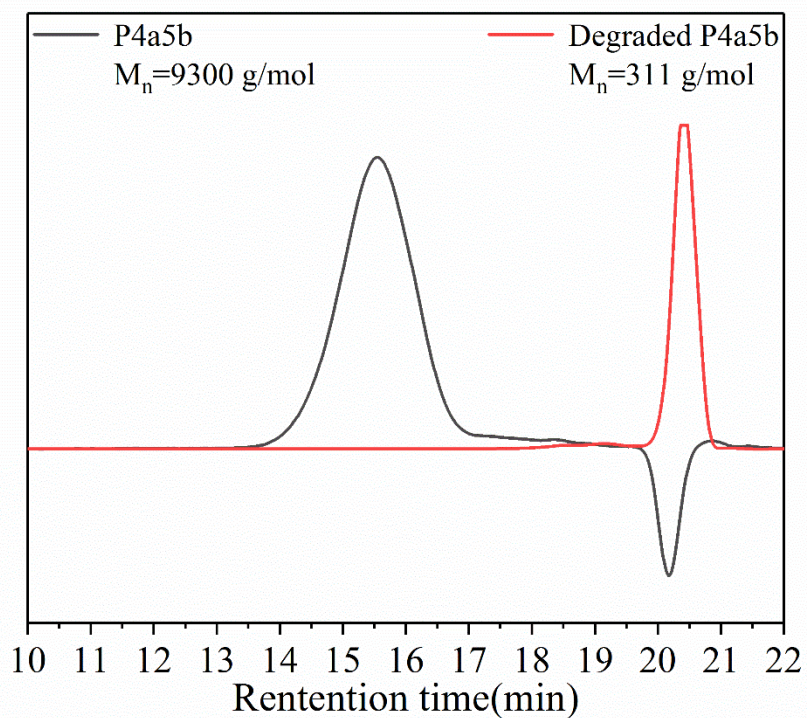

**Figure S10.** GPC curves of polymer **P-4a5b** and degraded polymer **D-P4a5b**.

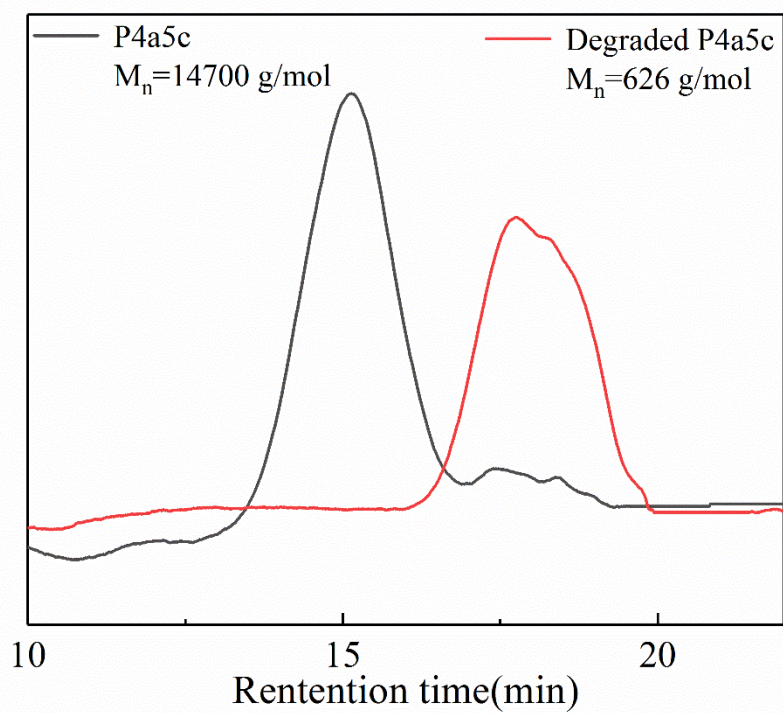

**Figure S11.** GPC curves of polymer **P-4a5c** and degraded polymer **D-P4a5c**.

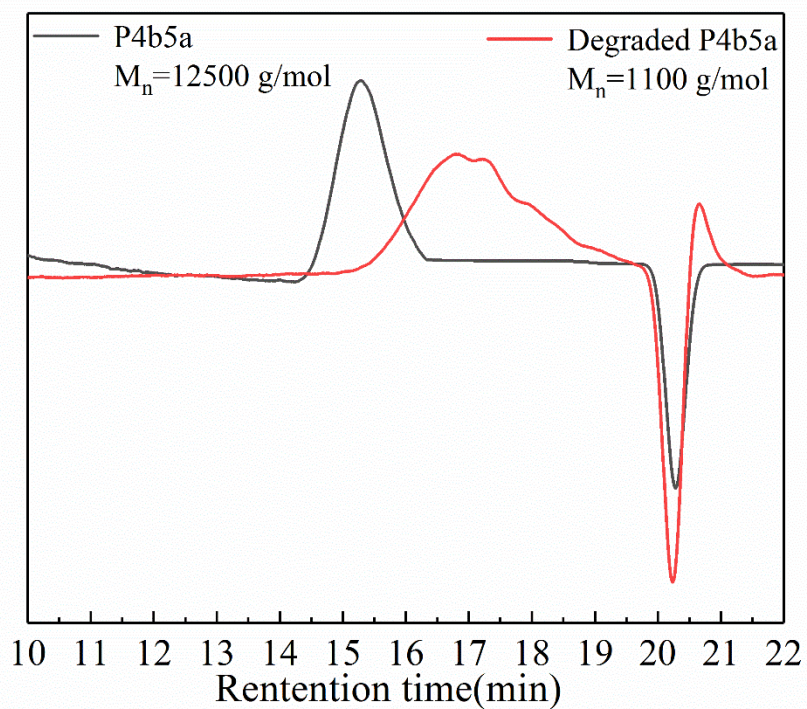

**Figure S12.** GPC curves of polymer **P-4b5a** and degraded polymer **D-P4b5a**.

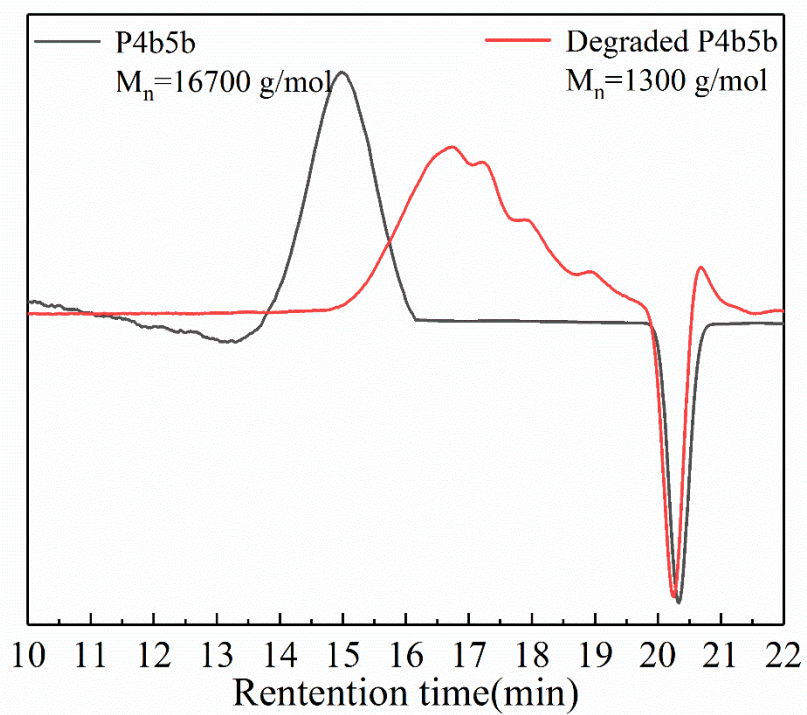

**Figure S13.** GPC curves of polymer **P-4b5b** and degraded polymer **D-P4b5b**.

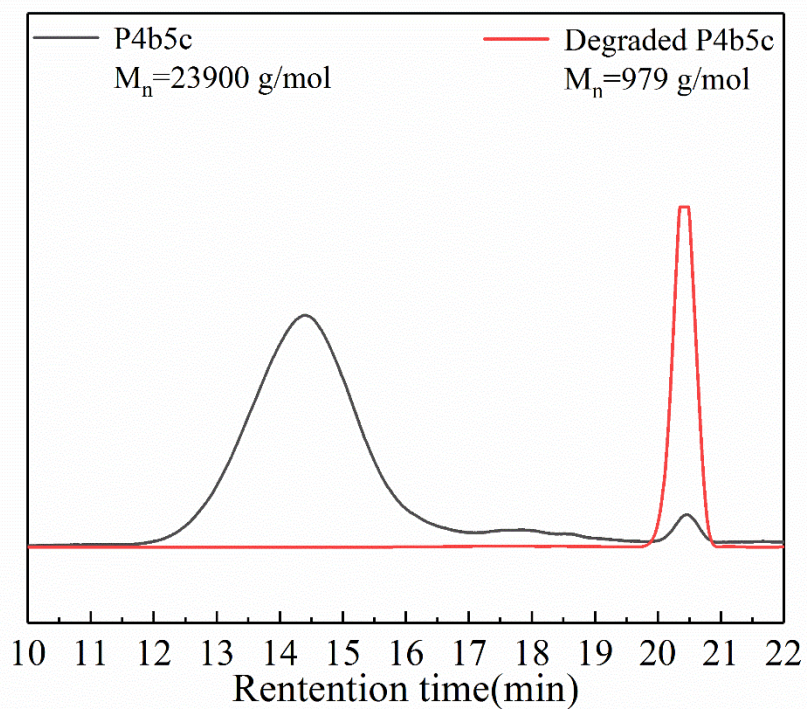

**Figure S14.** GPC curves of polymer **P-4b5c** and degraded polymer **D-P4b5c**.

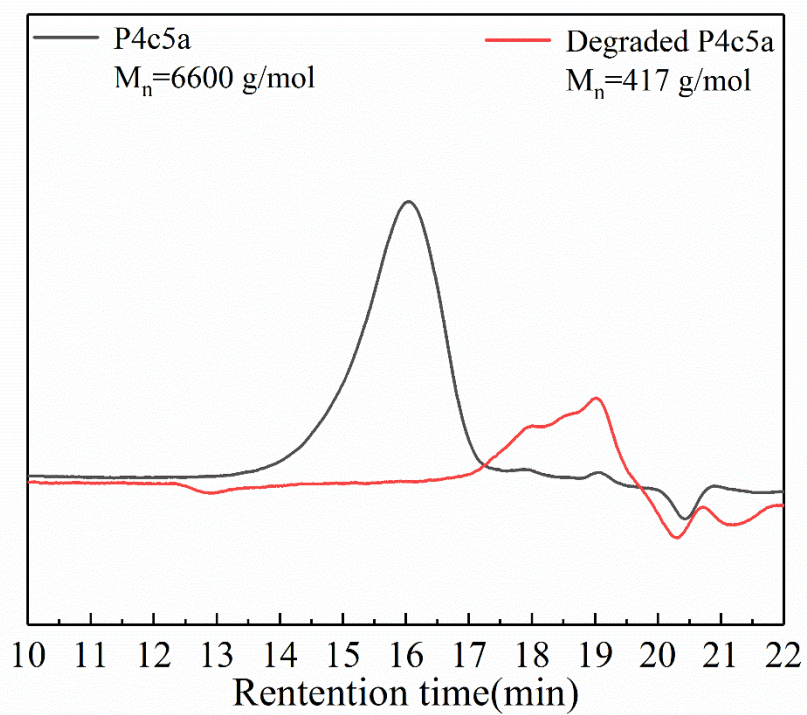

**Figure S15.** GPC curves of polymer **P-4c5a** and degraded polymer **D-P4c5a**.

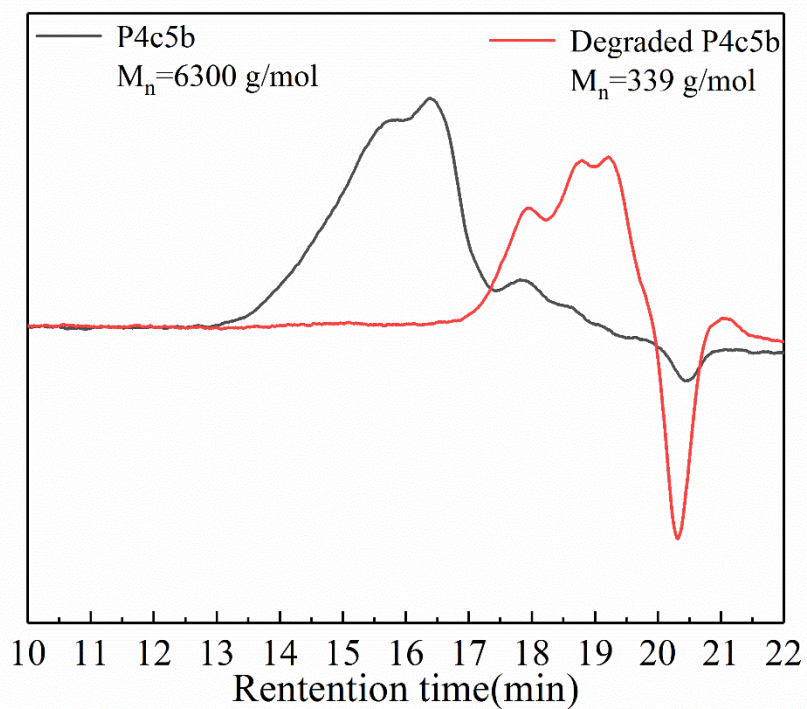

**Figure S16.** GPC curves of polymer **P-4c5b** and degraded polymer **D-P4c5b**.

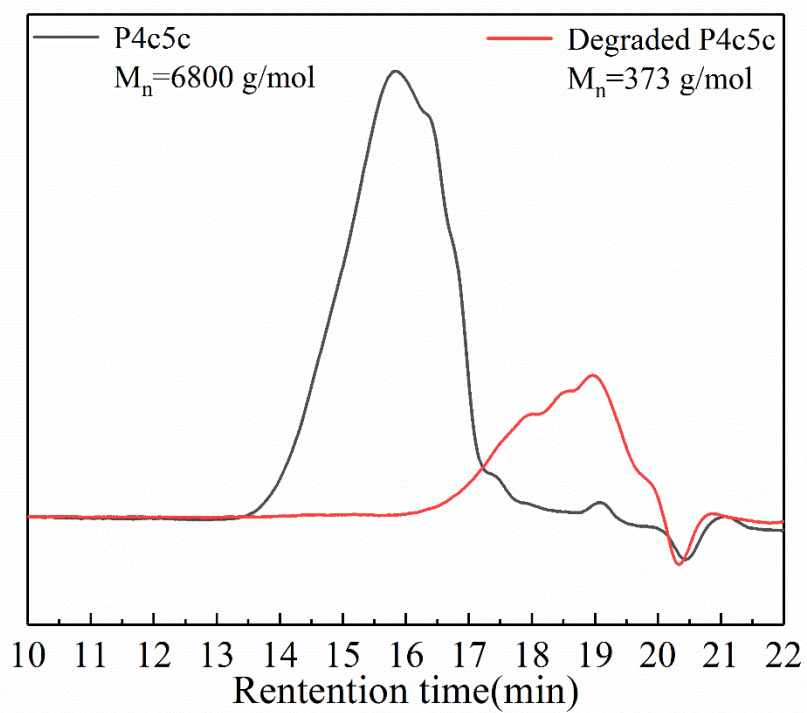

**Figure S17.** GPC curves of polymer **P-4c5c** and degraded polymer **D-P4c5c**.

## 8. FT-IR spectra

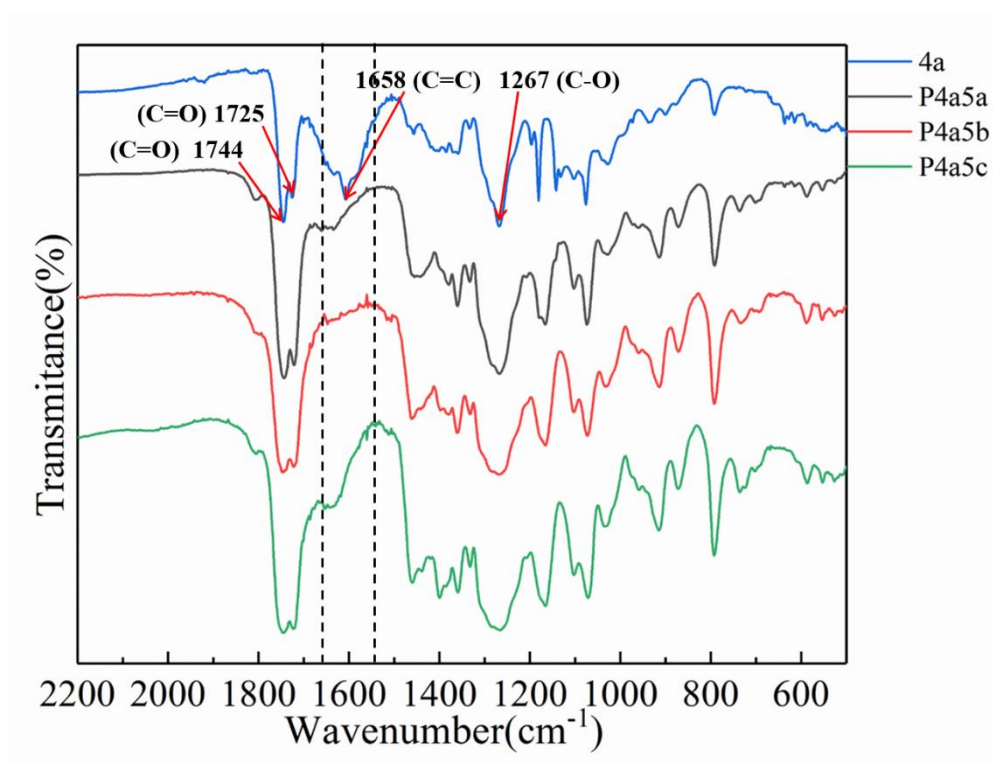

Figure S18. FT-IR spectra of polymers **P4a5**.

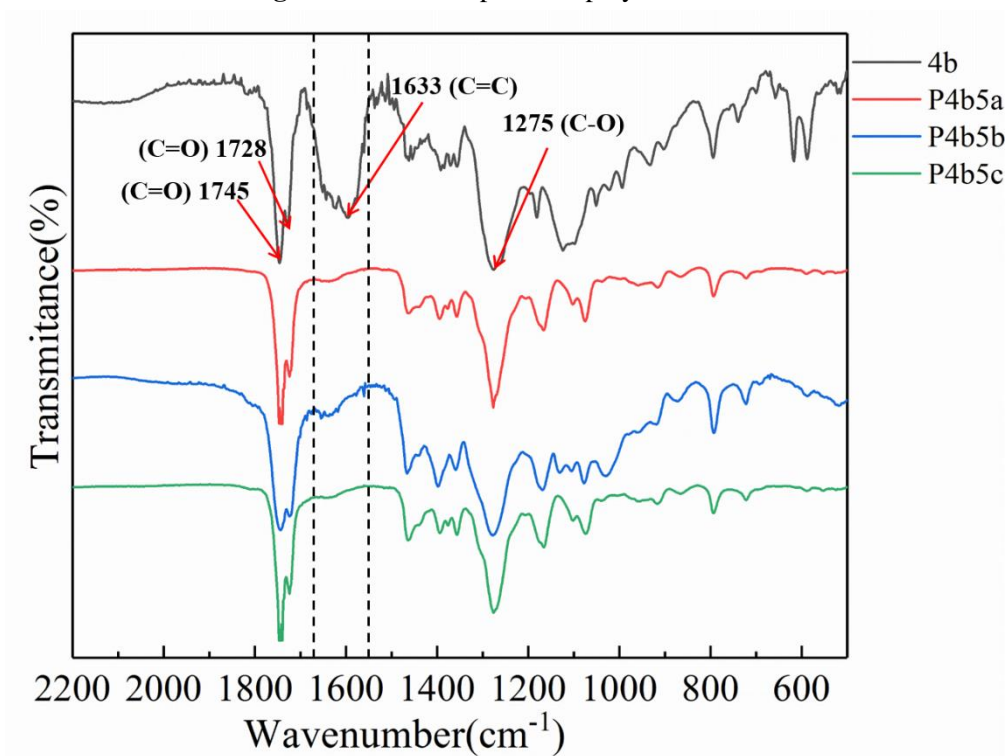

Figure S19. FT-IR spectra of polymers **P4b5**.



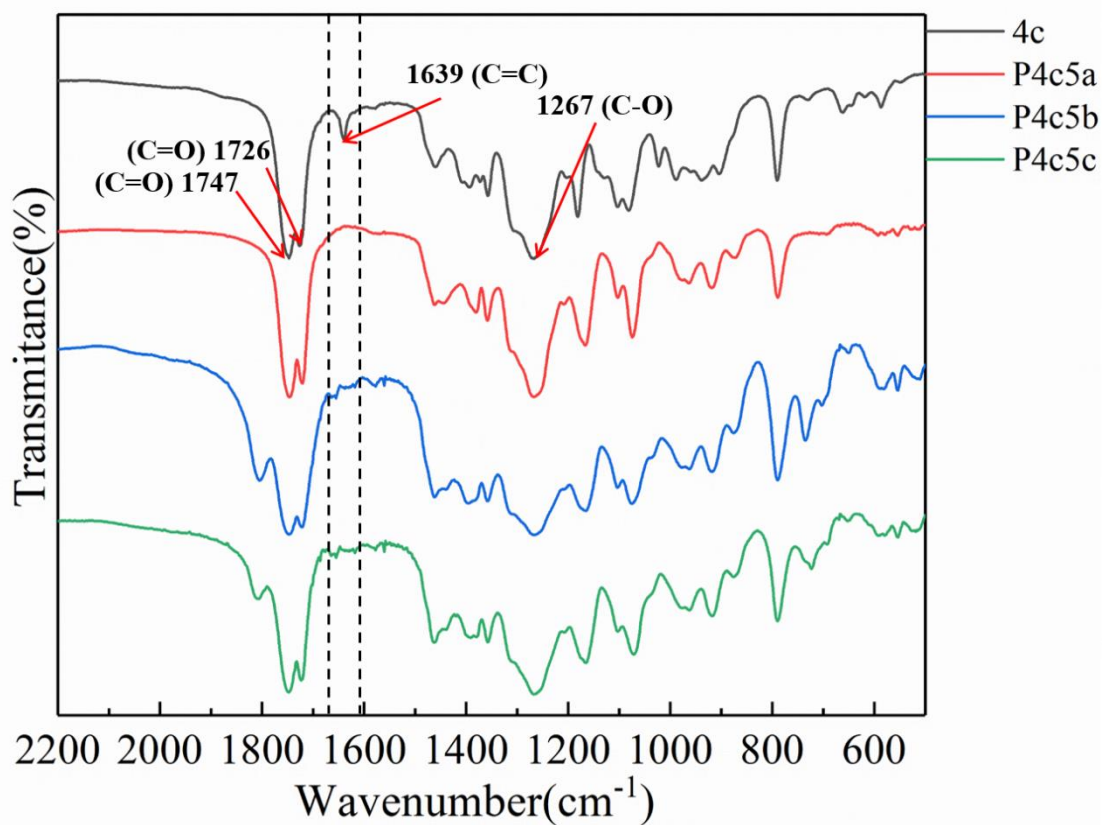

**Figure S20.** FT-IR spectra of polymers **P4c5**.

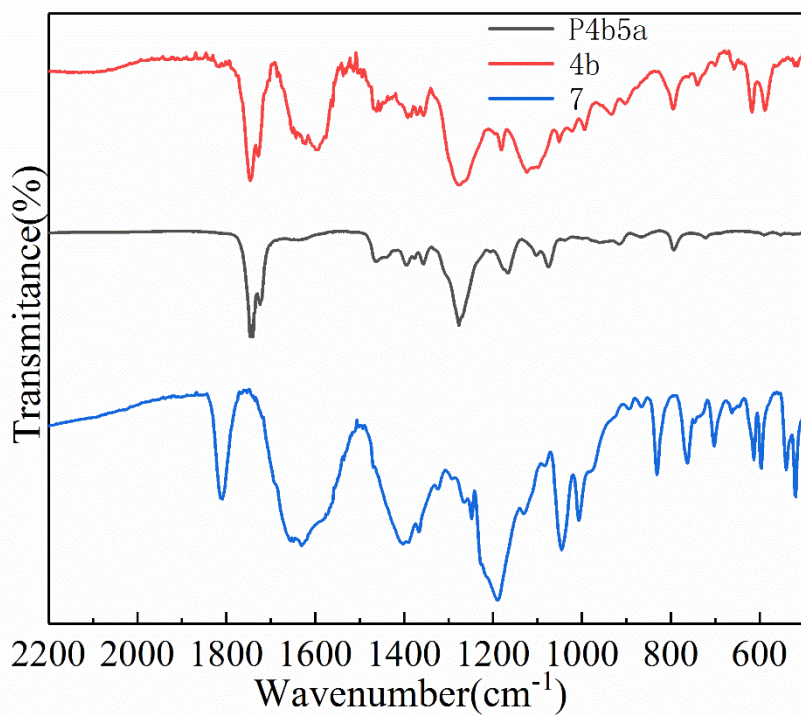

**Figure S21.** FT-IR spectra of **P4b5a**, **4b** and **7**.

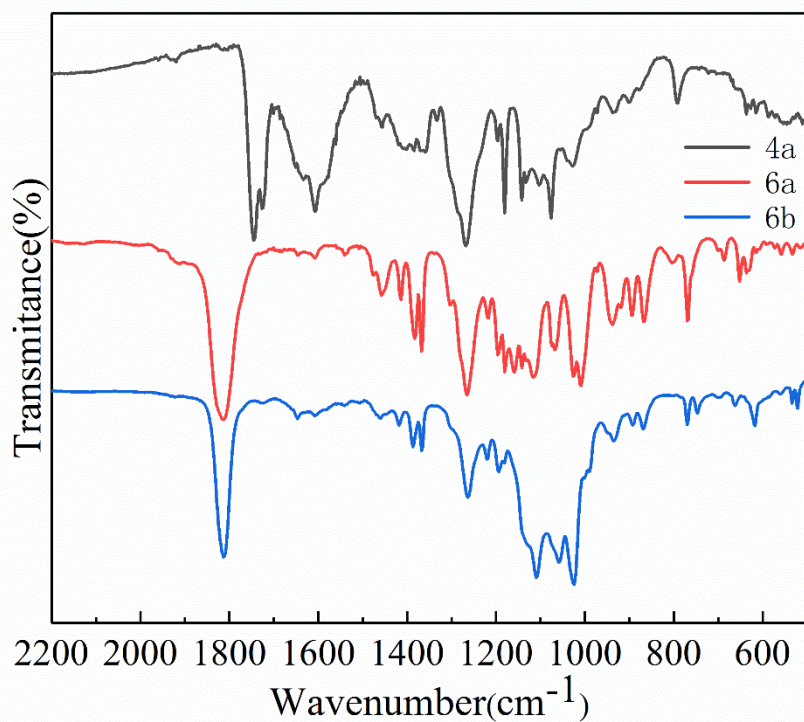

**Figure S22.** FT-IR spectra of **4a**, **6a** and **6b**.

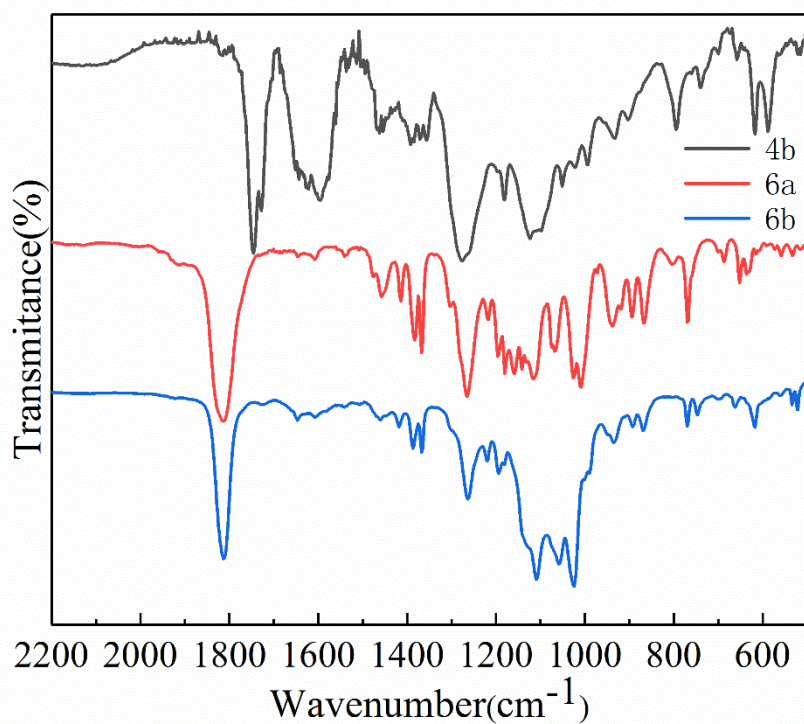

**Figure S23.** FT-IR spectra of **4b**, **6a** and **6b**.

## 8. NMR Spectra

### 8.1 NMR spectra of 4a

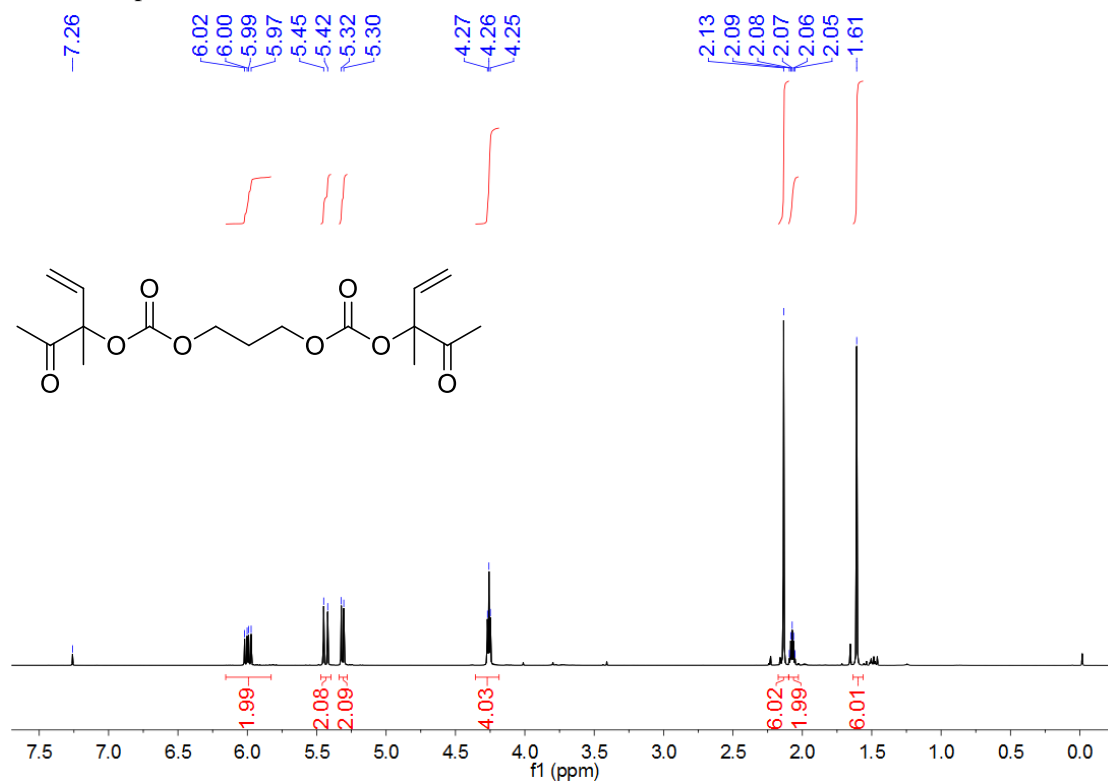

Figure S24. <sup>1</sup>H NMR spectrum of 4a.

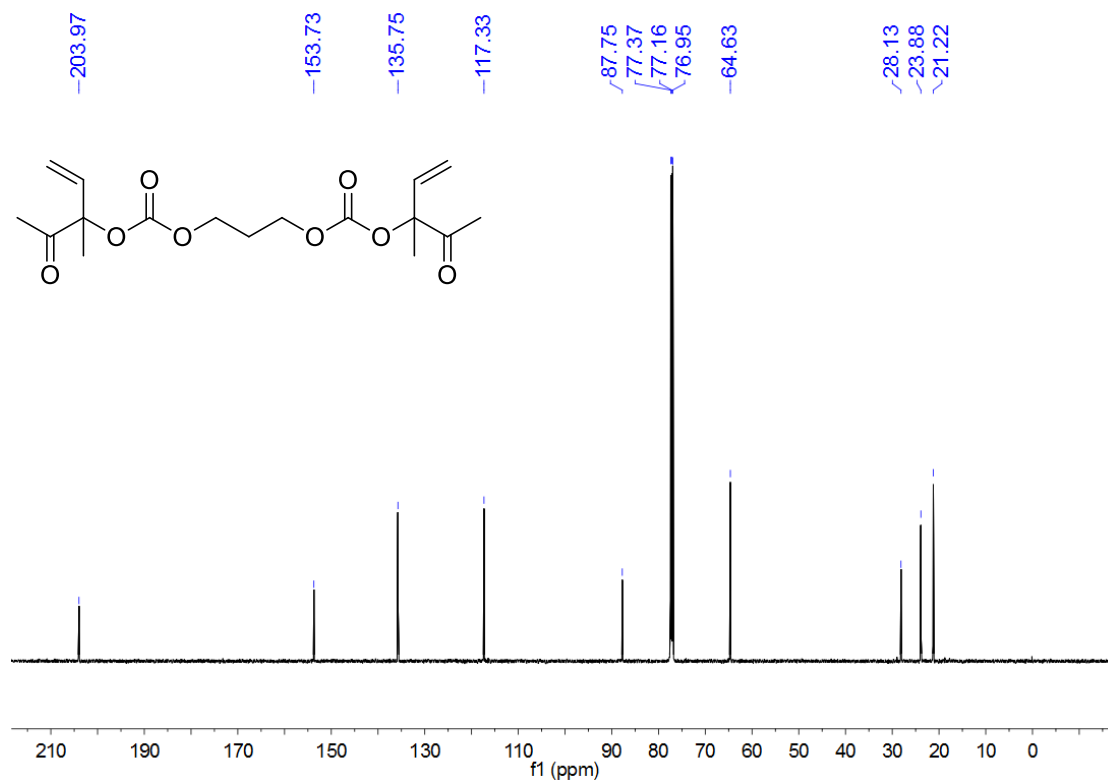

Figure S25. <sup>13</sup>C NMR spectrum of 4a.

8.2 NMR spectra of **4b**

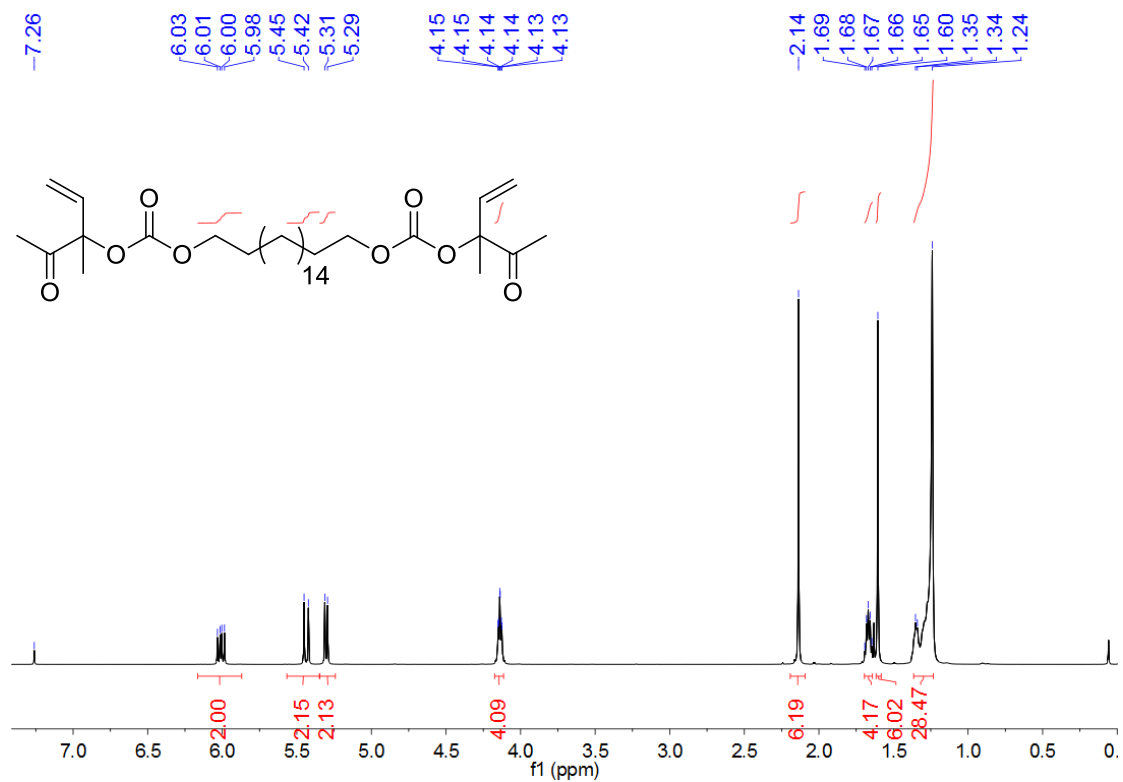

Figure S26. <sup>1</sup>H NMR spectrum of **4b**.

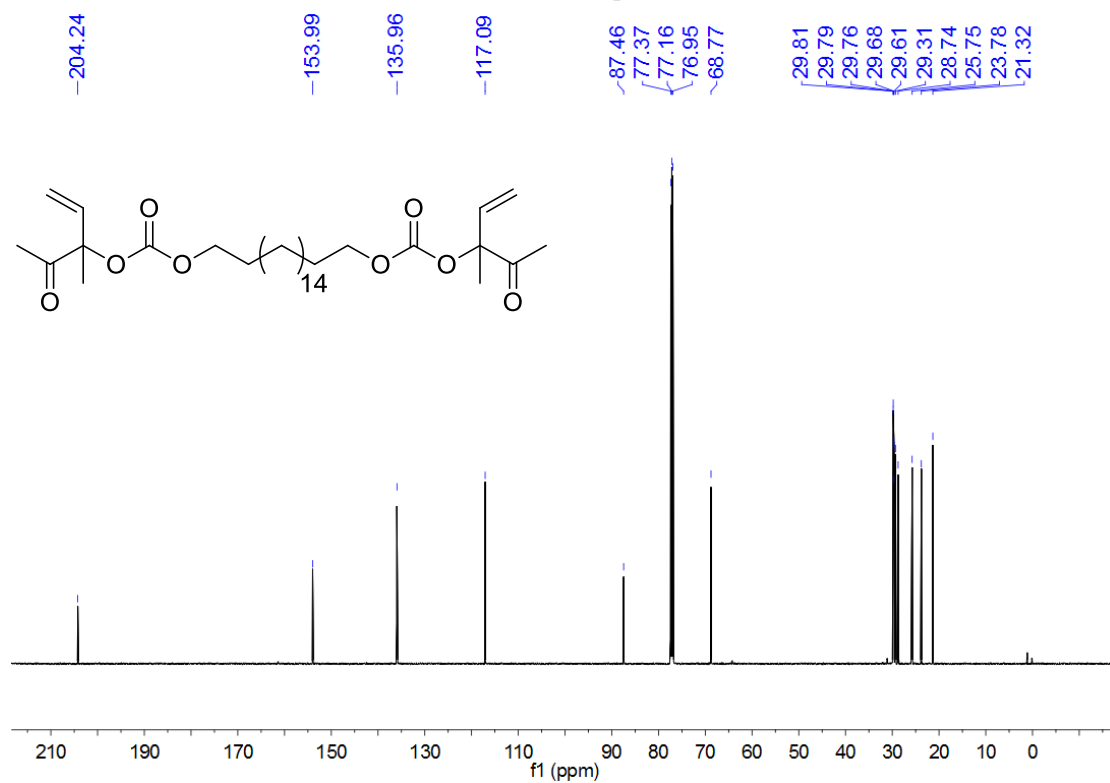

Figure S27. <sup>13</sup>C NMR spectrum of **4b**.

8.3 NMR spectra of **4c**

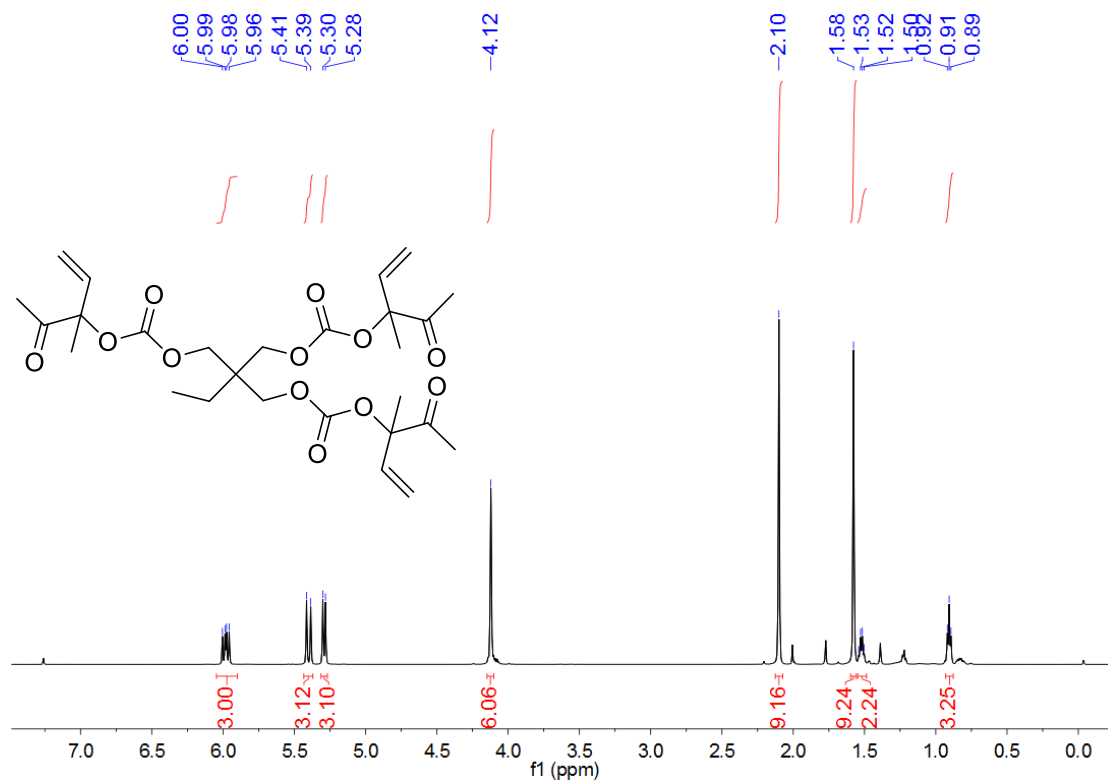

**Figure S28.** <sup>1</sup>H NMR spectrum of **4c**.

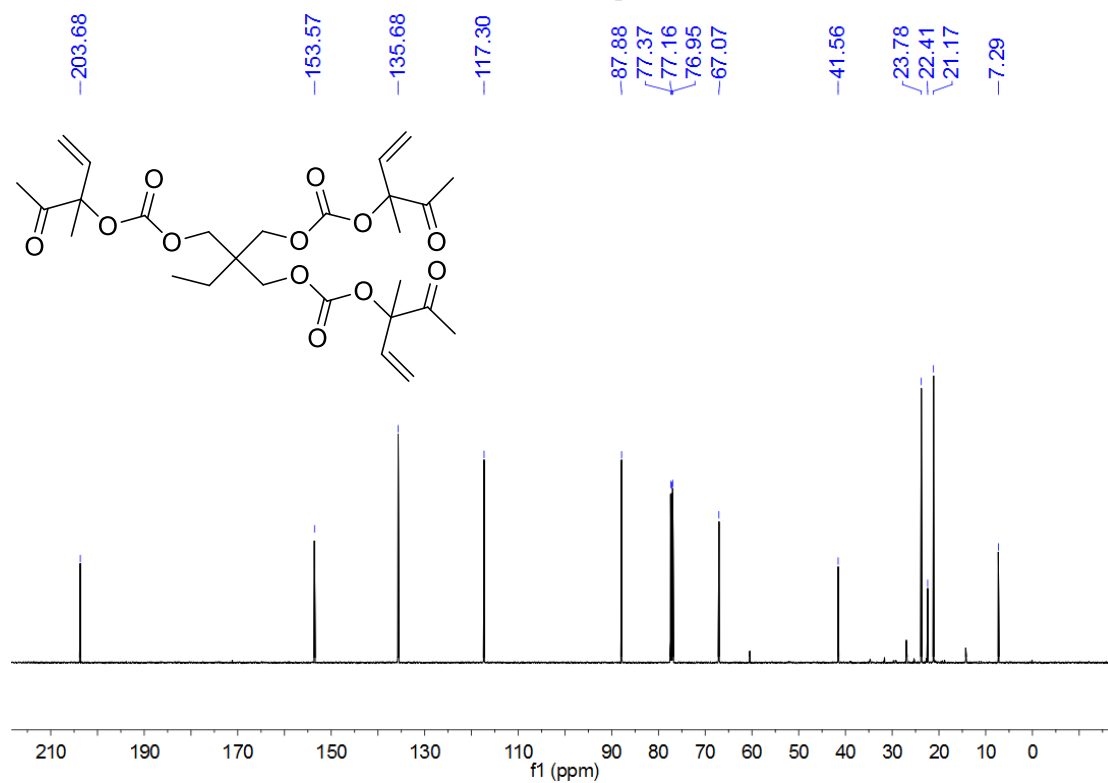

**Figure S29.** <sup>13</sup>C NMR spectrum of **4c**.

8.4 NMR spectra of **P4a5a**

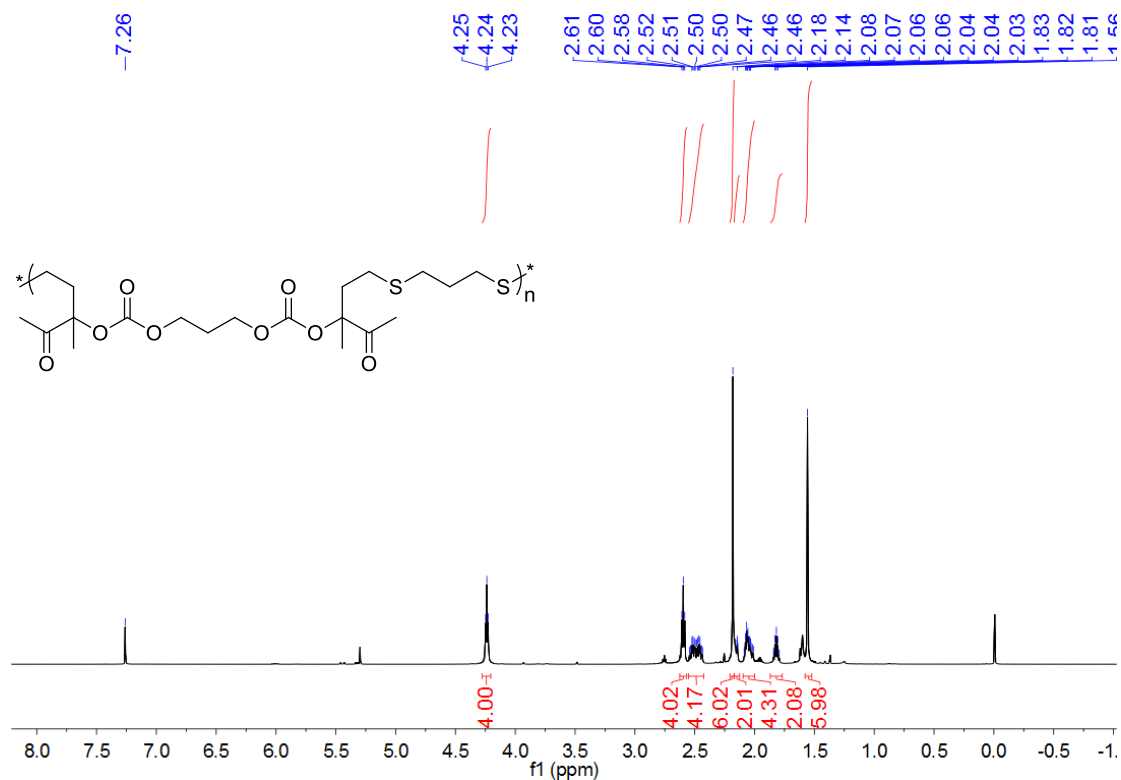

Figure S30.  $^1\text{H}$  NMR spectrum of **P4a5a**.

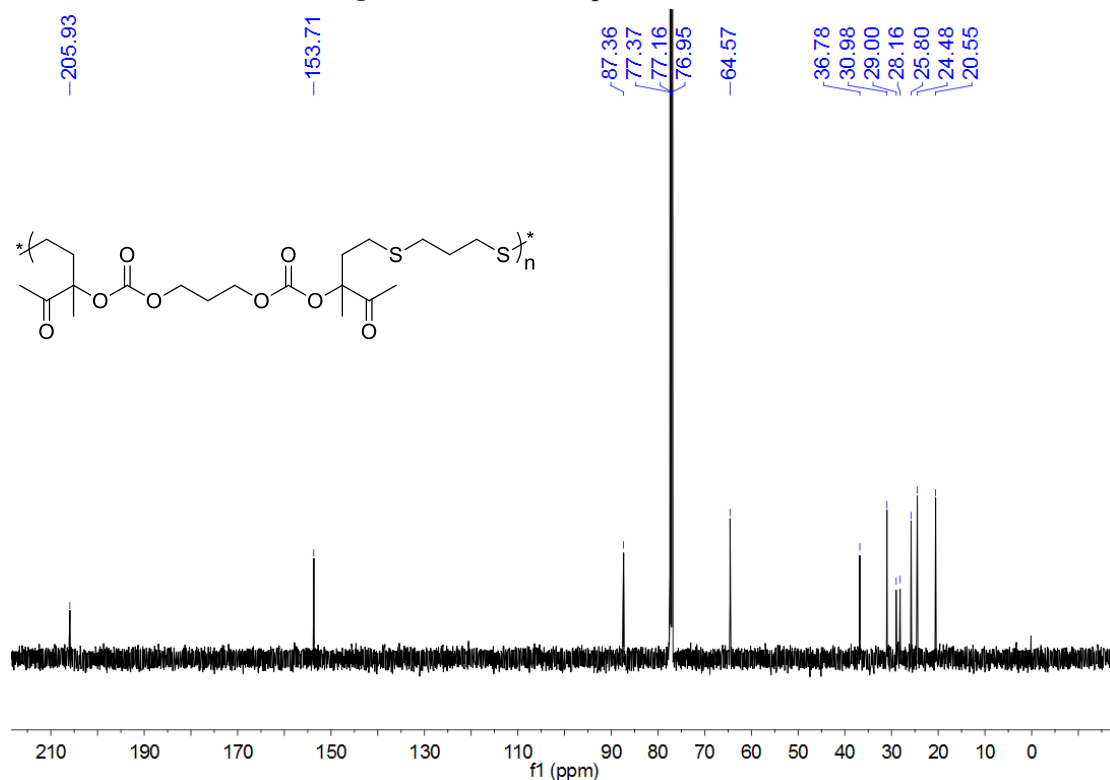

Figure S31.  $^{13}\text{C}$  NMR spectrum of **P4a5a**.

8.5 NMR spectra of **P4a5b**

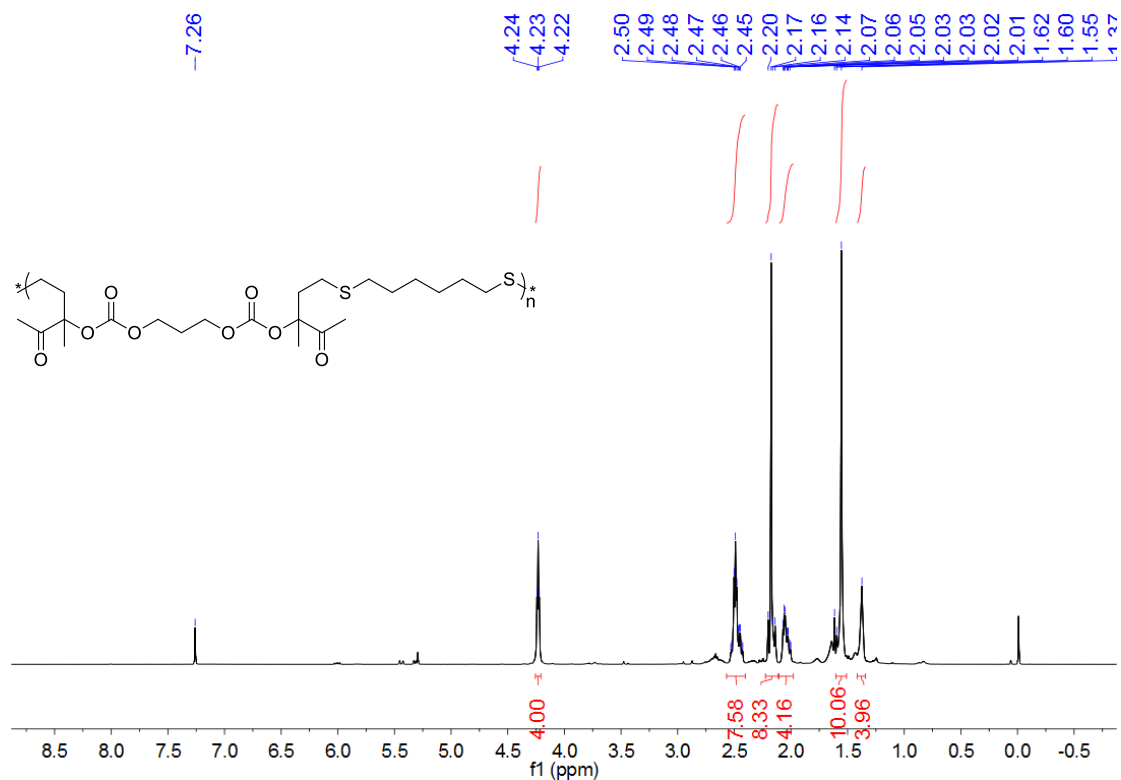

Figure S32. <sup>1</sup>H NMR spectrum of **P4a5b**.

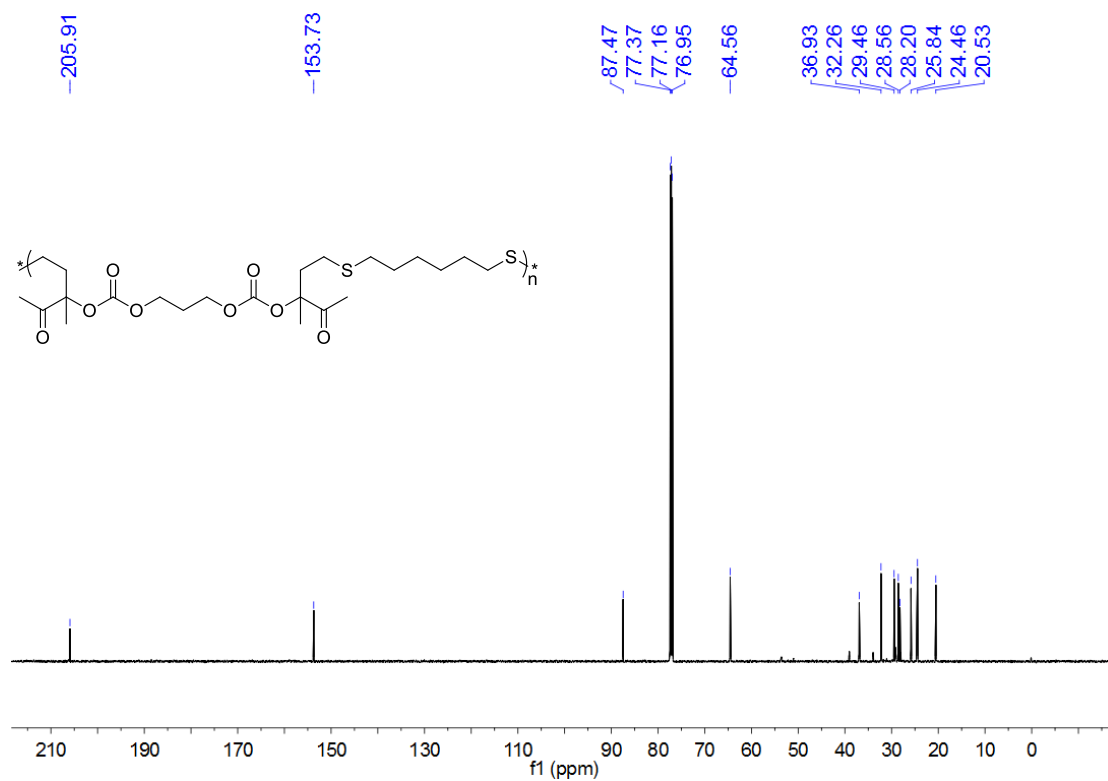

Figure S33. <sup>13</sup>C NMR spectrum of **P4a5b**.

8.6 NMR spectra of **P4a5c**

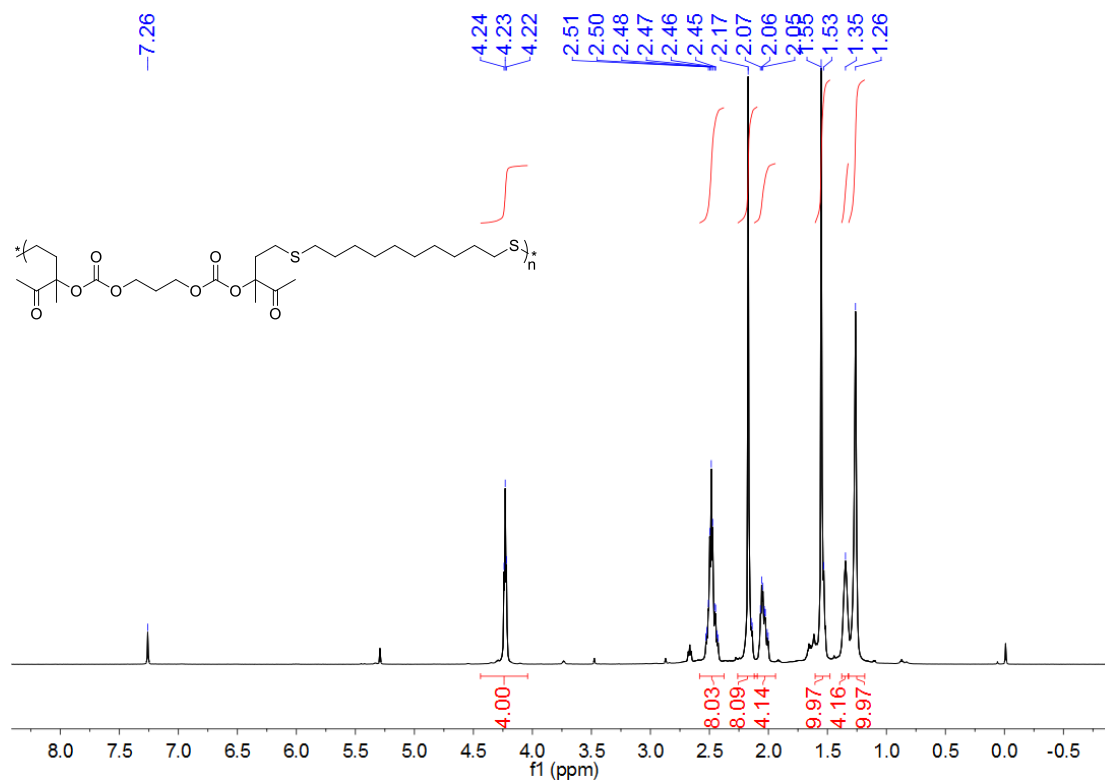

Figure S34  $^1\text{H}$  NMR spectrum of **P4a5c**.

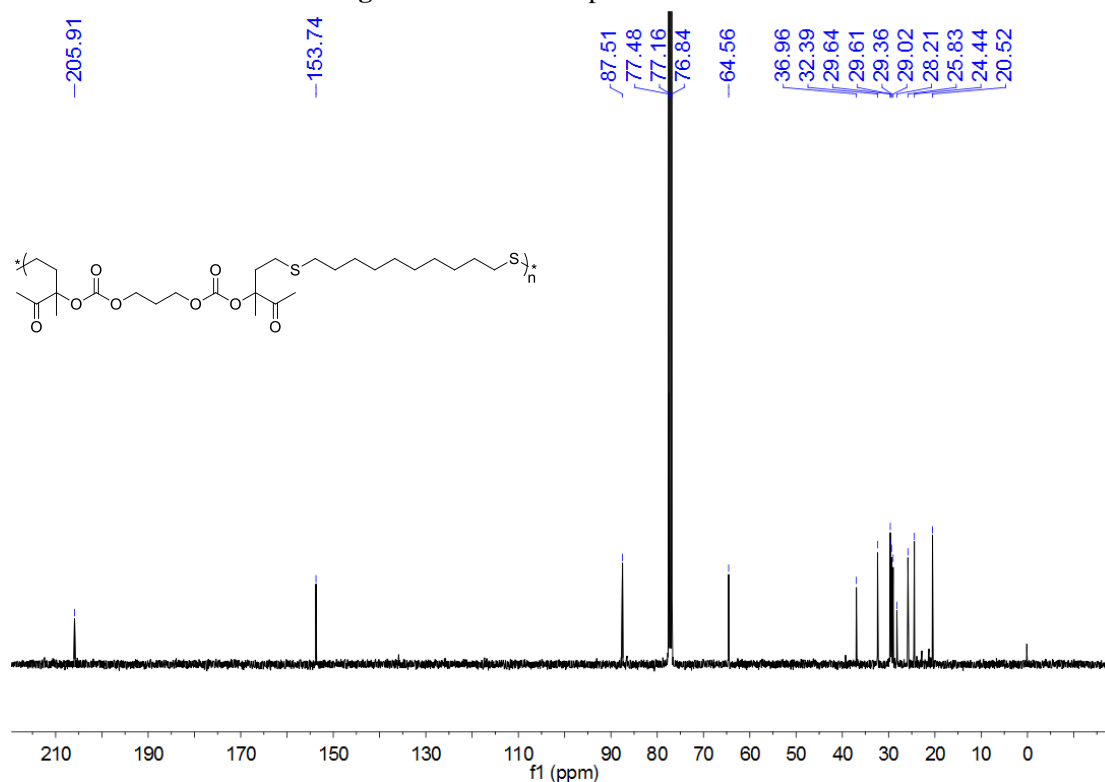

Figure S35.  $^{13}\text{C}$  NMR spectrum of **P4a5c**.



8.7 NMR spectra of **P4b5a**

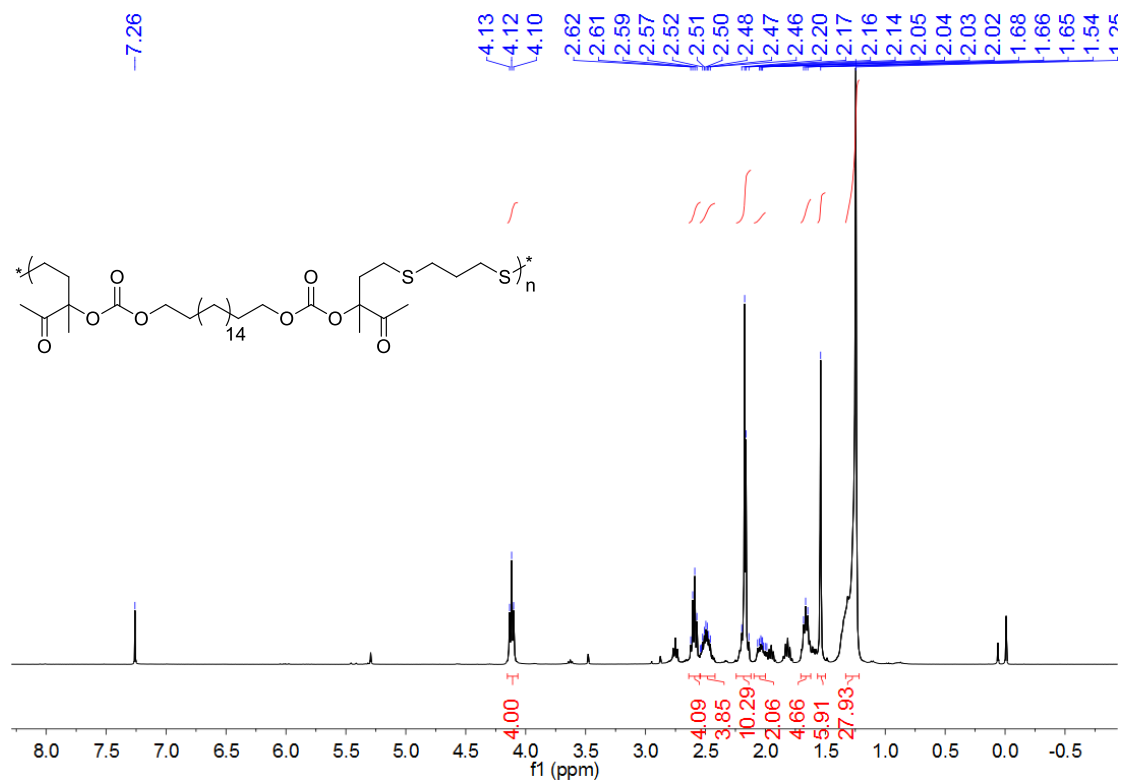

Figure S36. <sup>1</sup>H NMR spectrum of **P4b5a**.

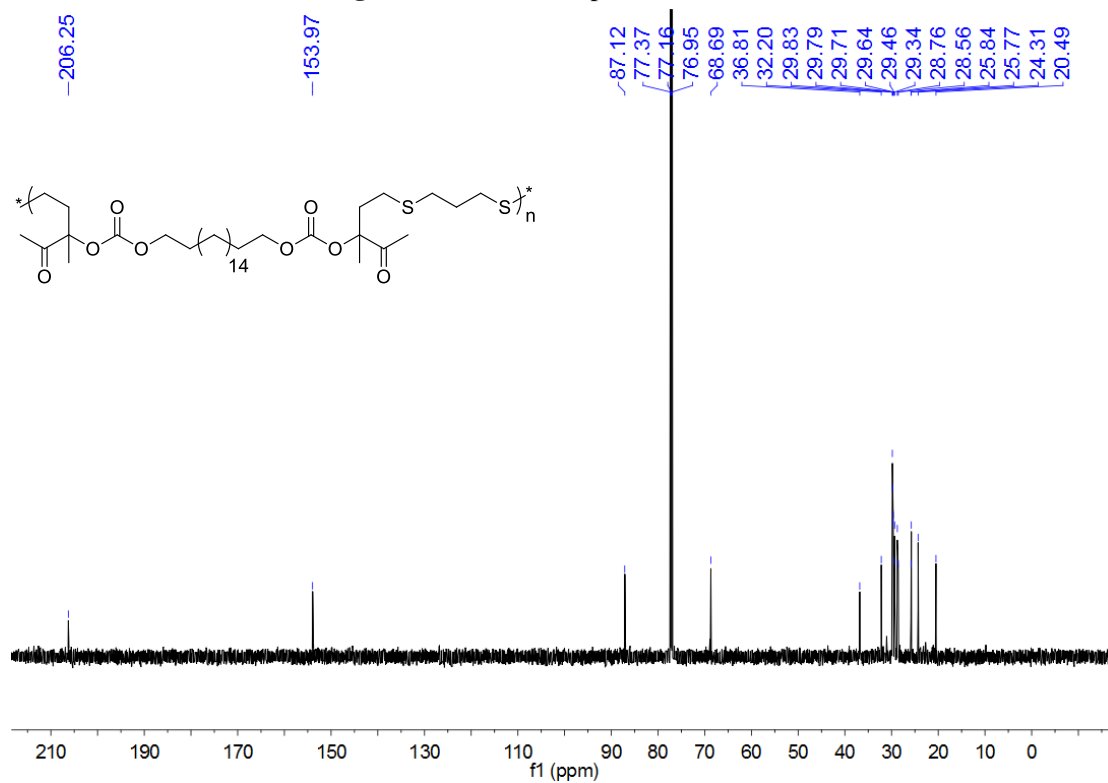

Figure S37. <sup>13</sup>C NMR spectrum of **P4b5a**.

8.8 NMR spectra of **P4b5b**

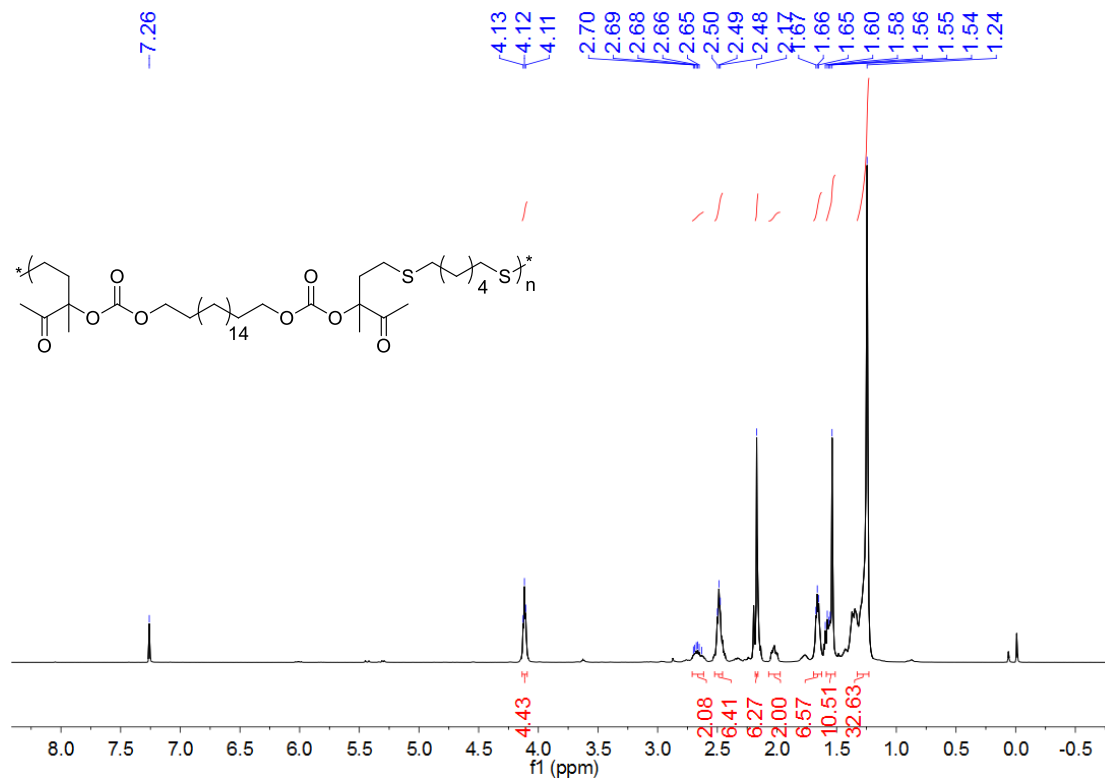

Figure S38. <sup>1</sup>H NMR spectrum of **P4b5b**.

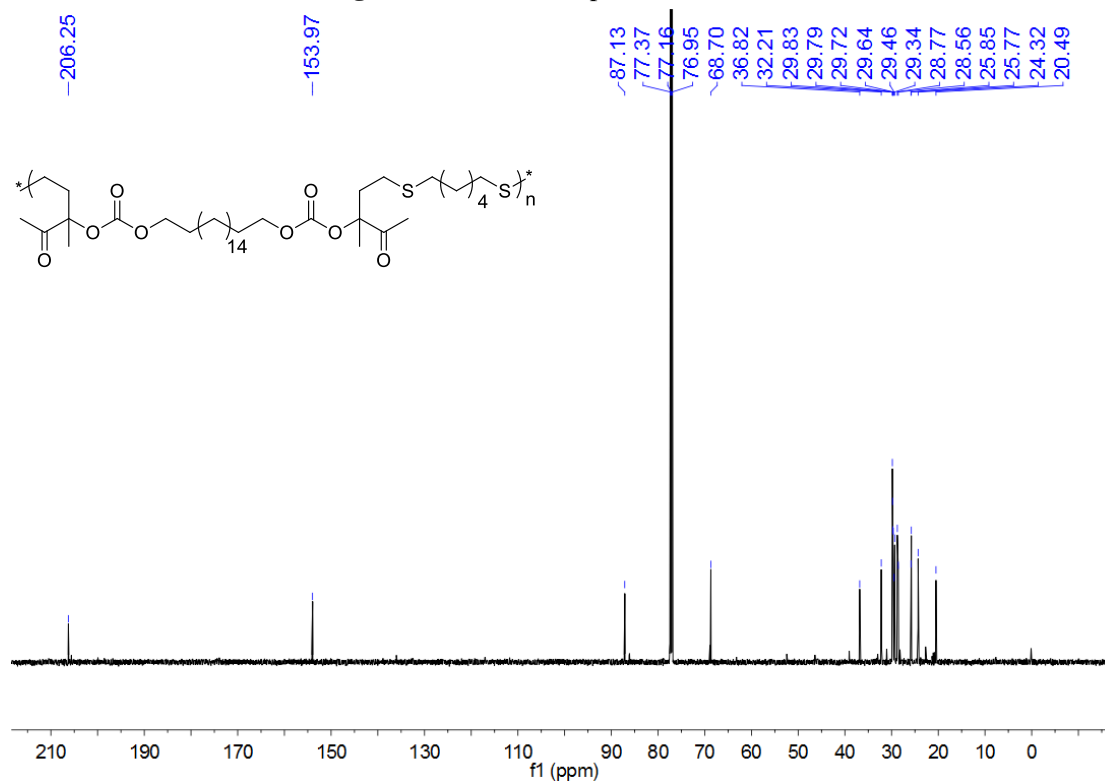

Figure S39. <sup>13</sup>C NMR spectrum of **P4b5b**.

8.9 NMR spectra of **P4b5c**

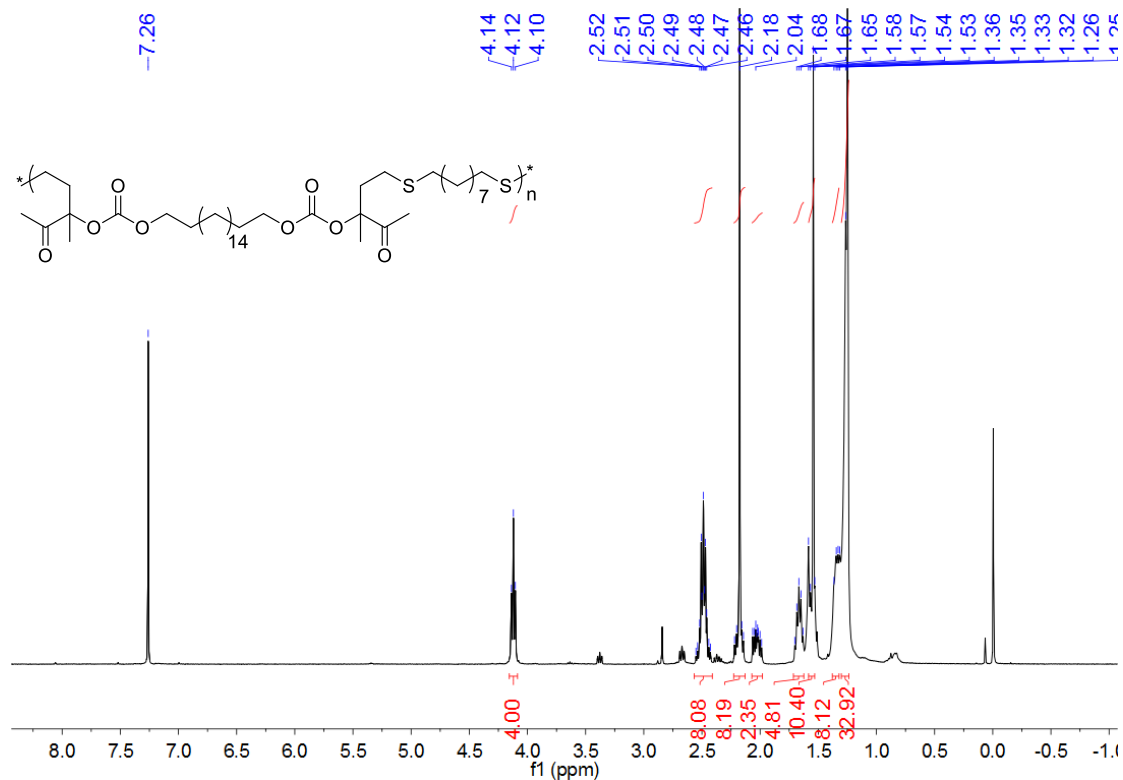

**Figure S40.**  $^1\text{H}$  NMR spectrum of **P4b5c**.

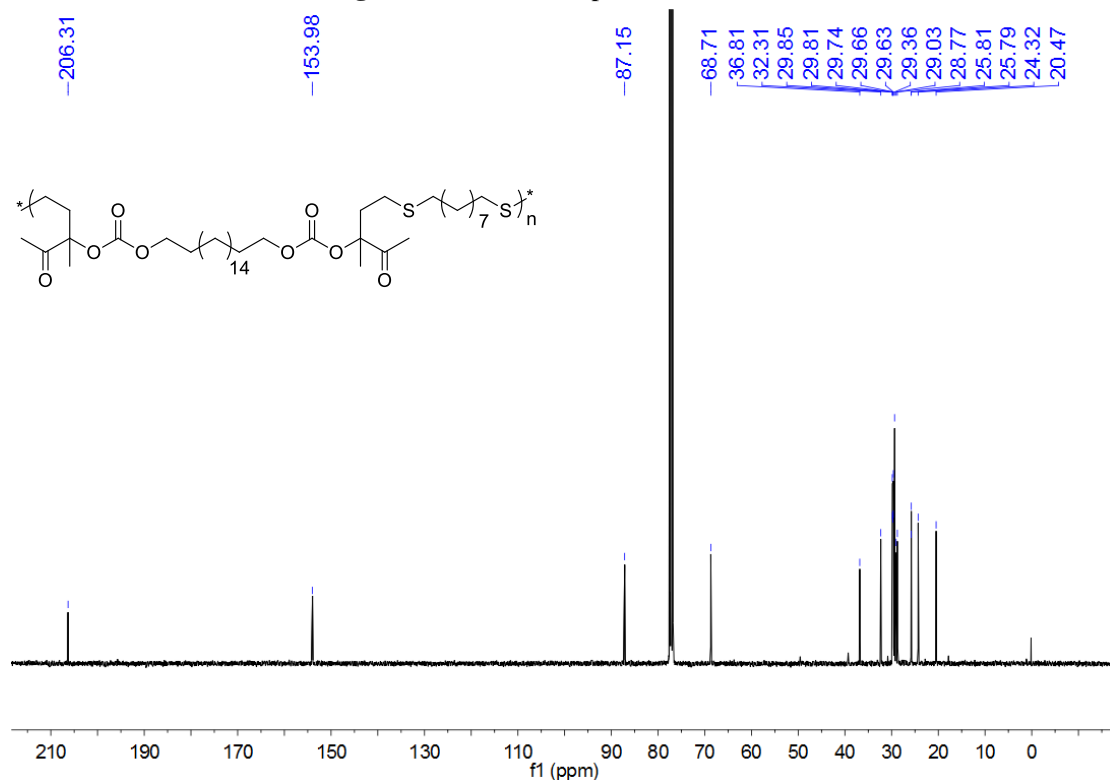

**Figure S41.**  $^{13}\text{C}$  NMR spectrum of **P4b5c**.

8.10 NMR spectra of **P4c5a**

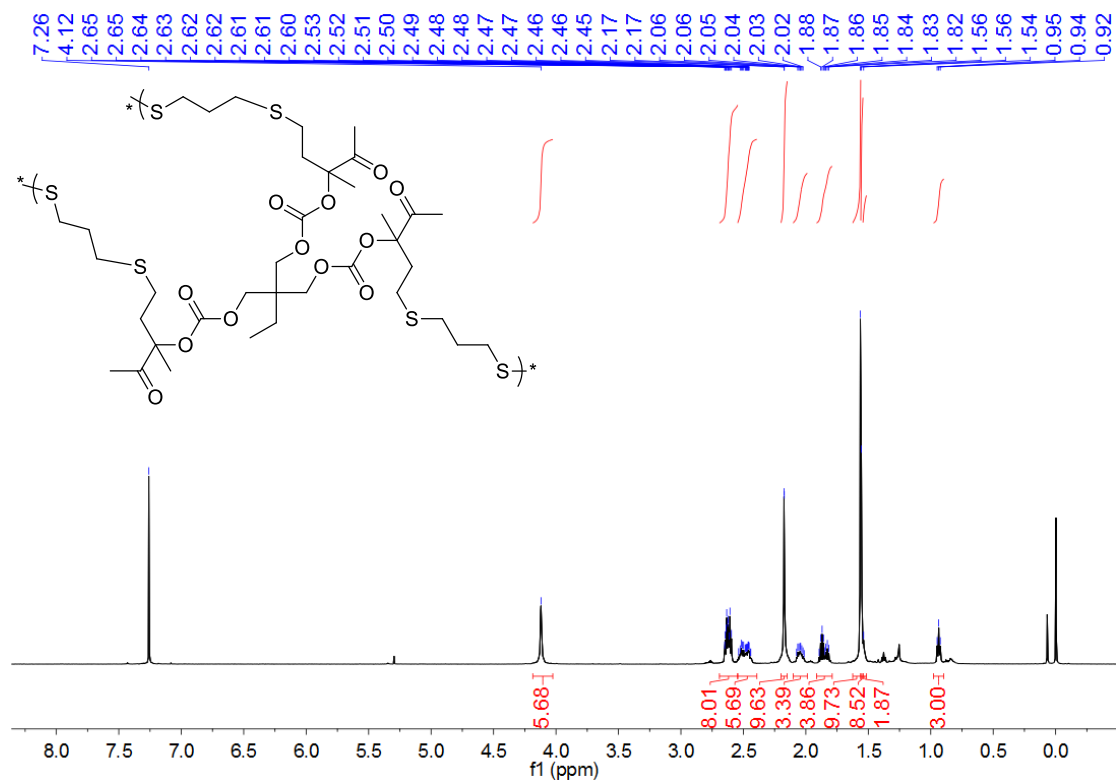

Figure S42. <sup>1</sup>H NMR spectrum of **P4c5a**.

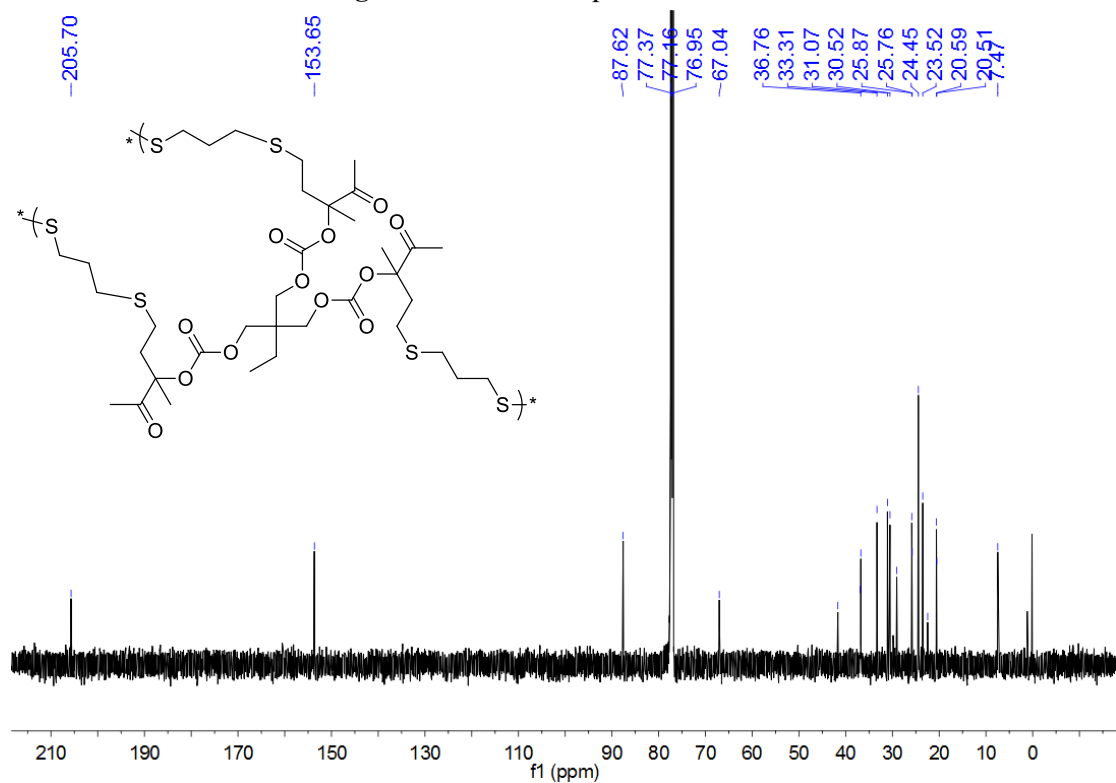

Figure S43. <sup>13</sup>C NMR spectrum of **P4c5a**.

8.11 NMR spectra of **P4c5b**

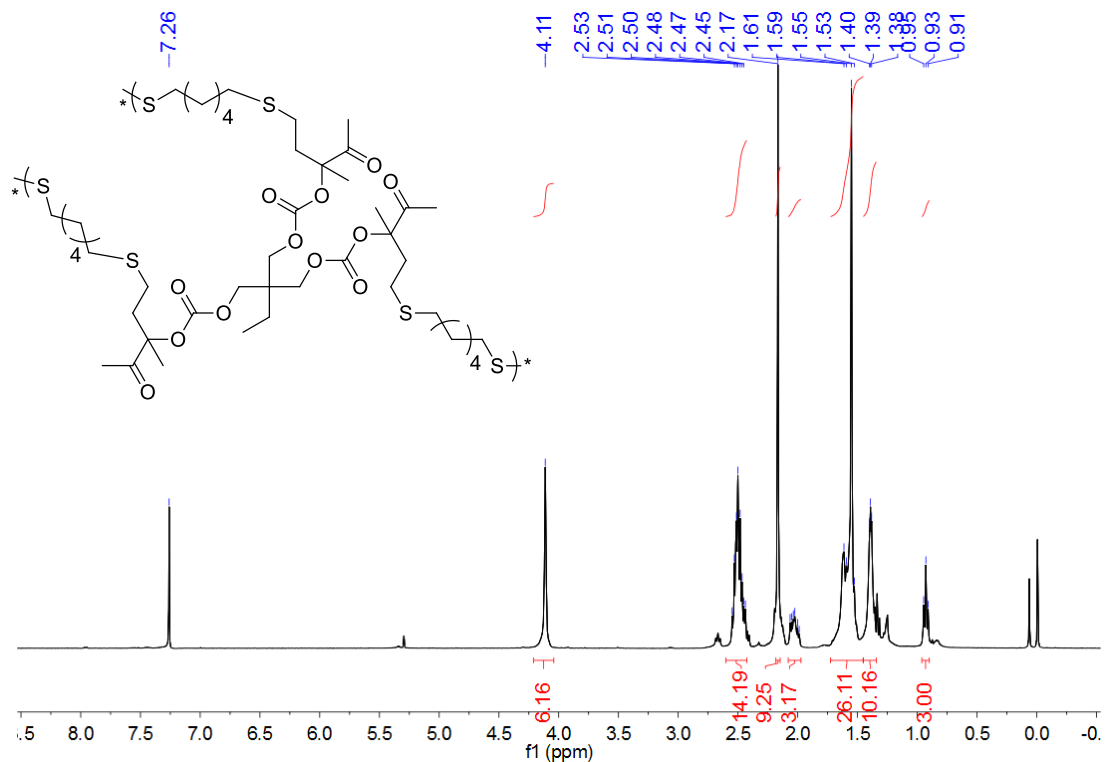

**Figure S44.**  $^1\text{H}$  NMR spectrum of **P4c5b**.

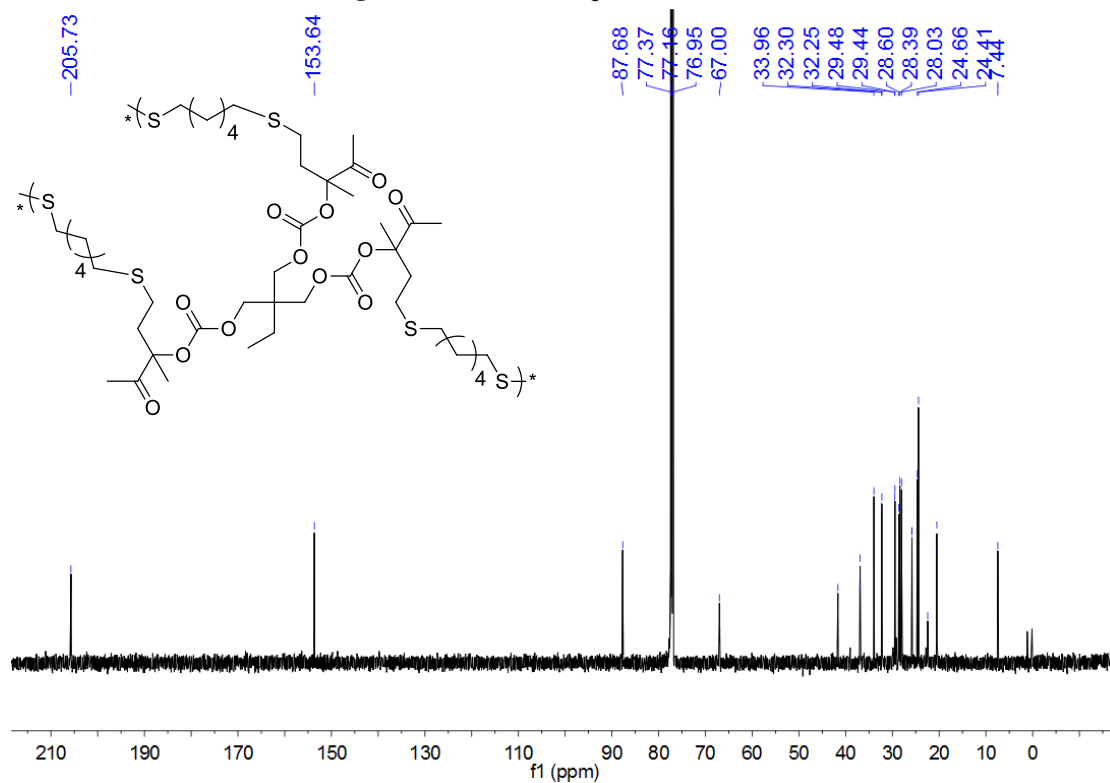

**Figure S45.**  $^{13}\text{C}$  NMR spectrum of **P4c5b**.

8.12 NMR spectra of **P4c5c**

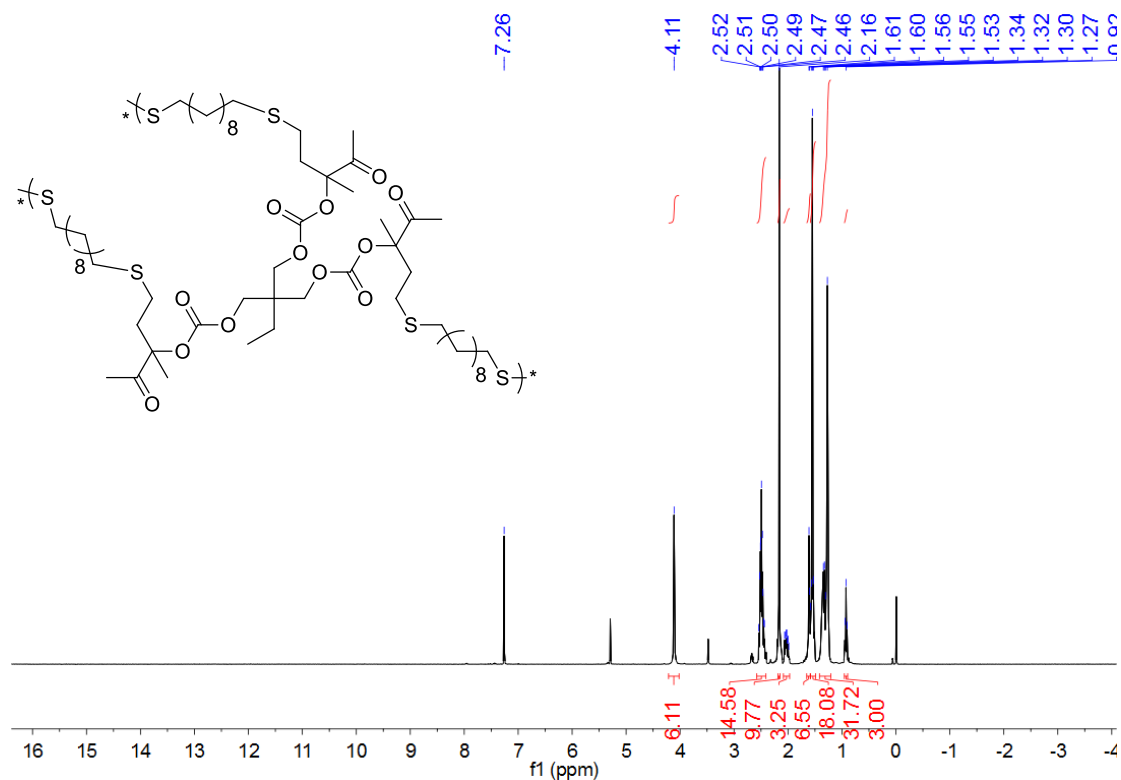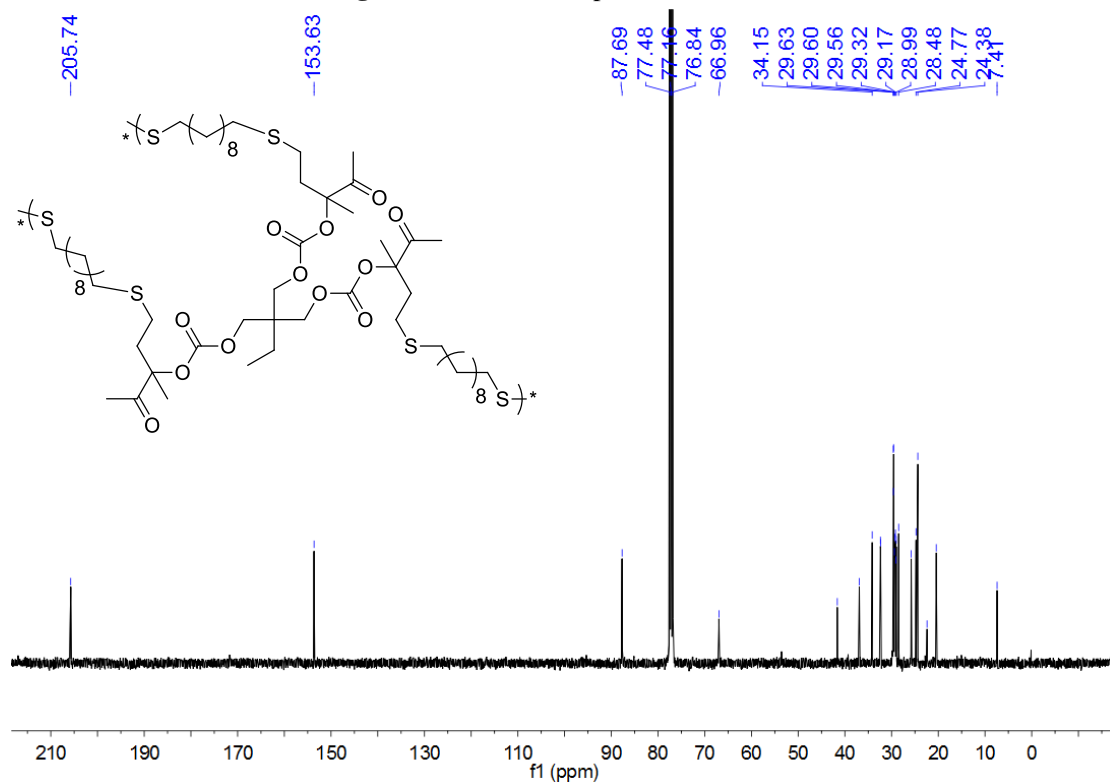

8.13 NMR spectra of **6**

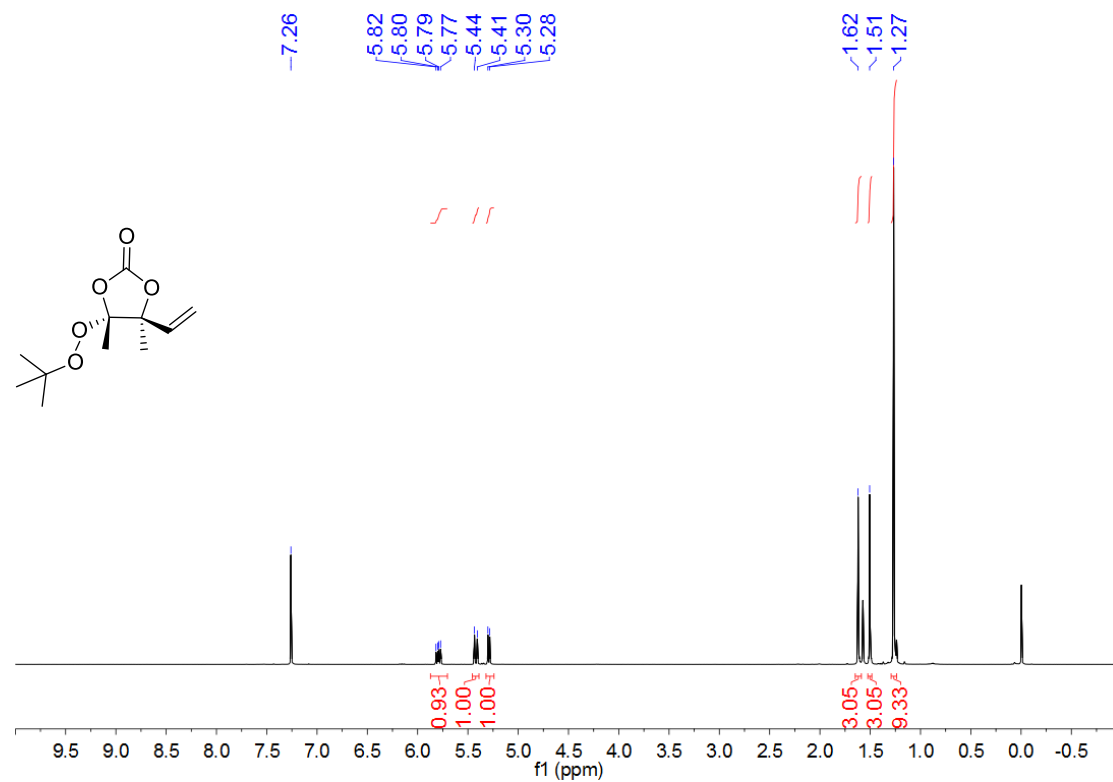

Figure S48. <sup>1</sup>H NMR spectrum of **6a**.

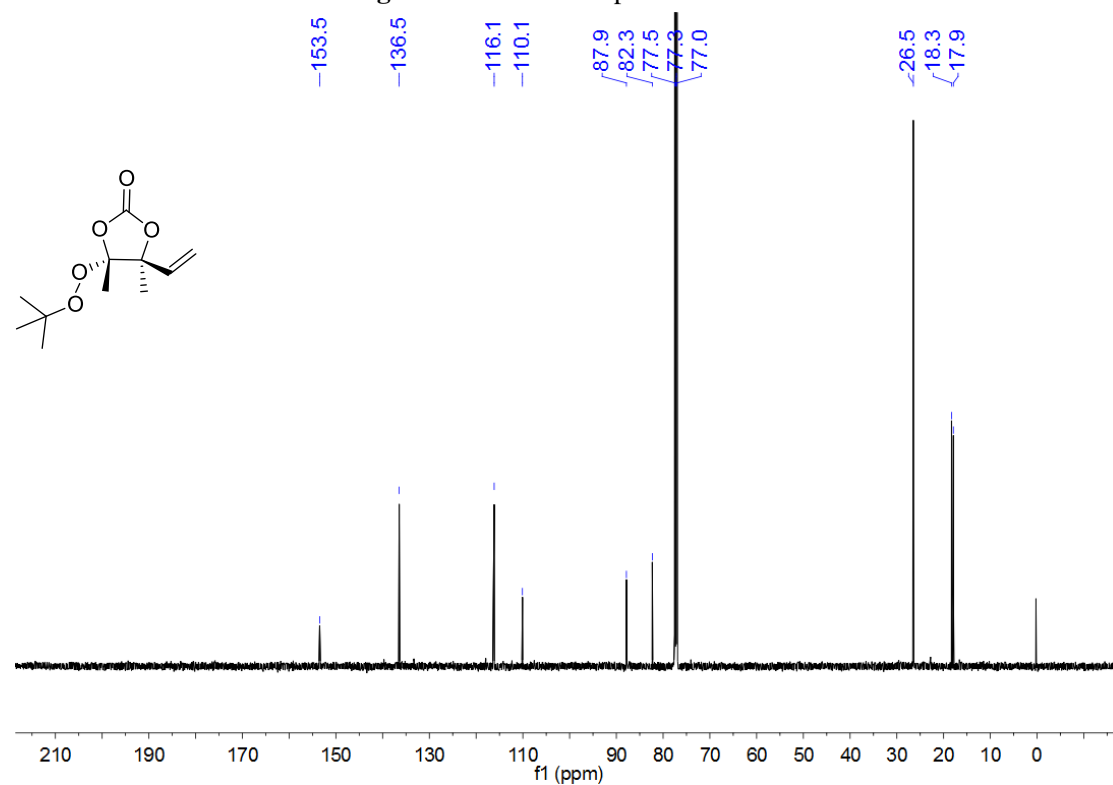

Figure S49. <sup>13</sup>C NMR spectrum of **6a**.

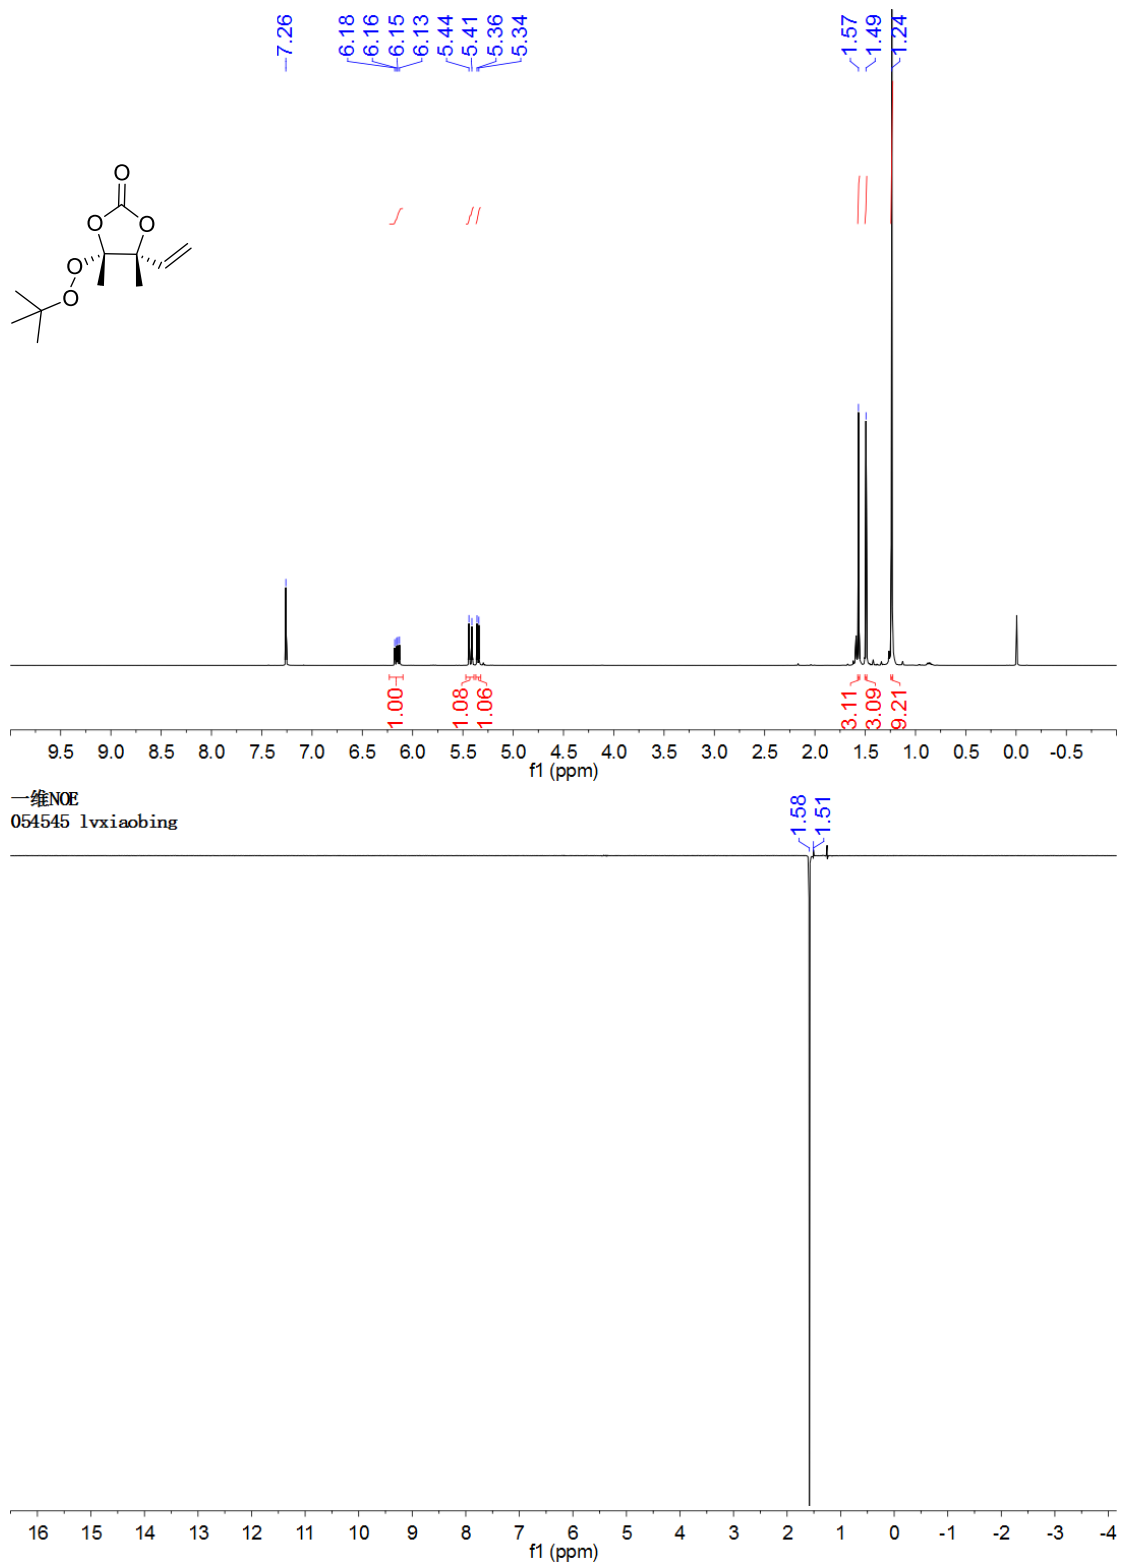

**Figure S50.** <sup>1</sup>H NMR spectrum and NOE spectrum of **6b**.



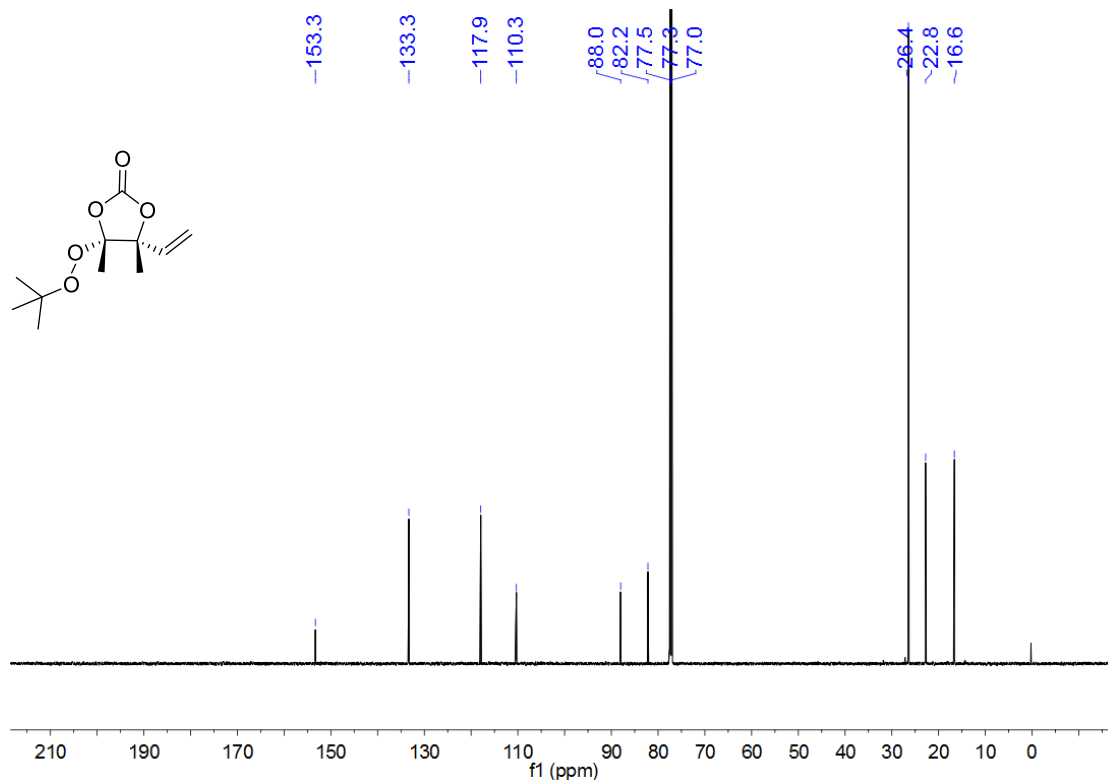

8.14 NMR spectra of **7**

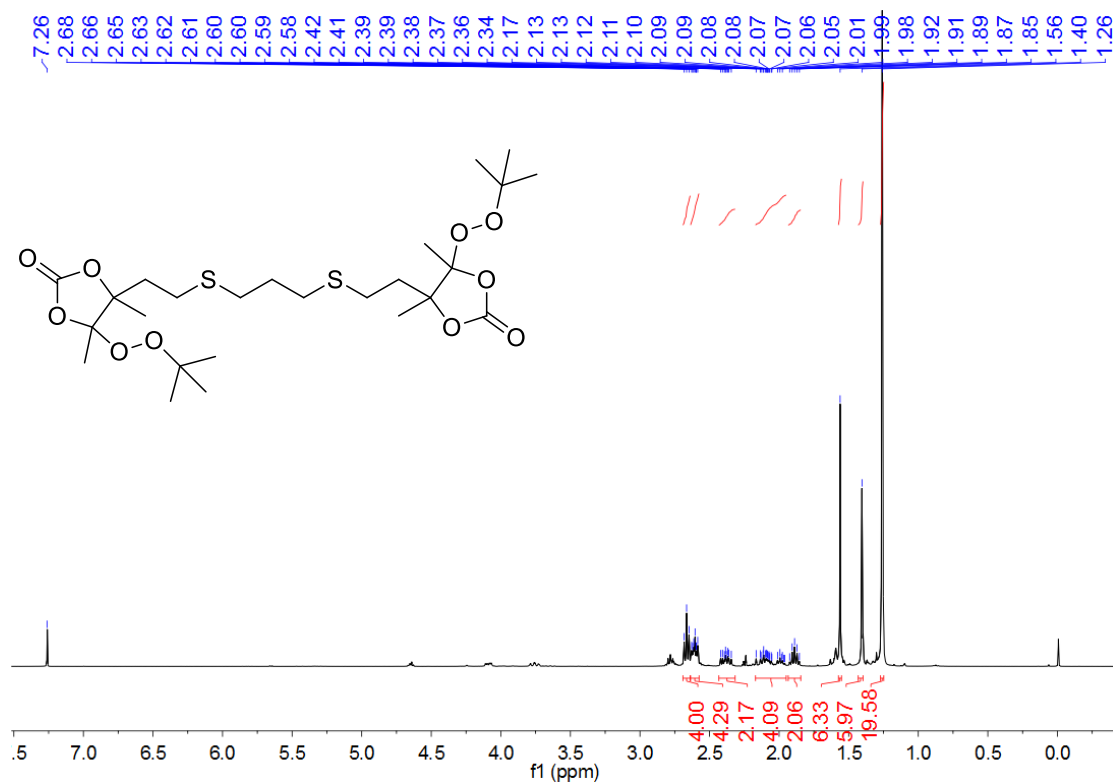

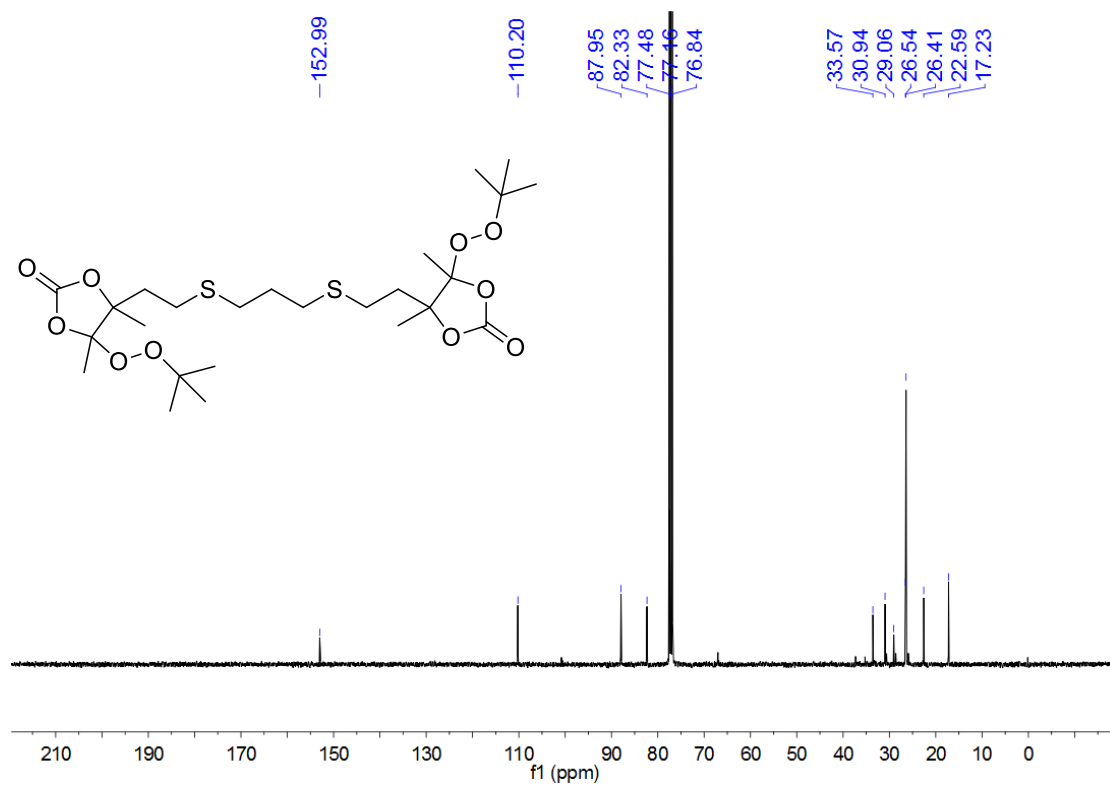

Figure S53.  $^{13}\text{C}$  NMR spectrum of 7.

## 9. ESI MS Spectra

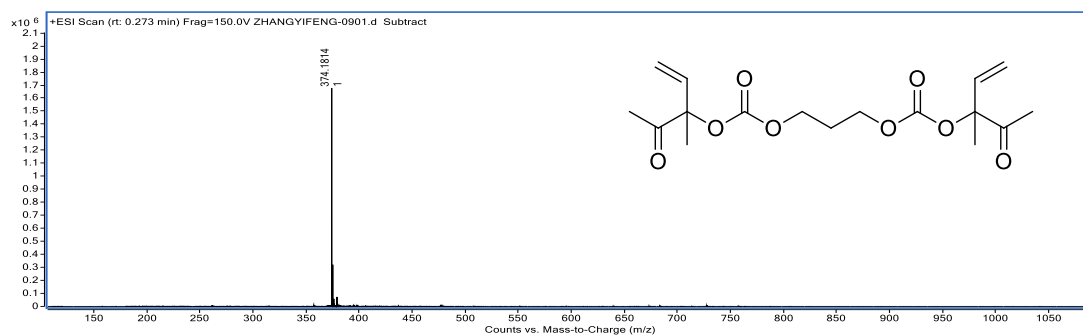

Figure S54. ESI MS spectrum of 4a.

20210721-ZYF-M566 #17-26 RT: 0.14-0.22 AV: 10 SB: 3 0.01-0.03 NL: 2.04E7  
T: FTMS + p ESI Full ms [200.00-1000.00]

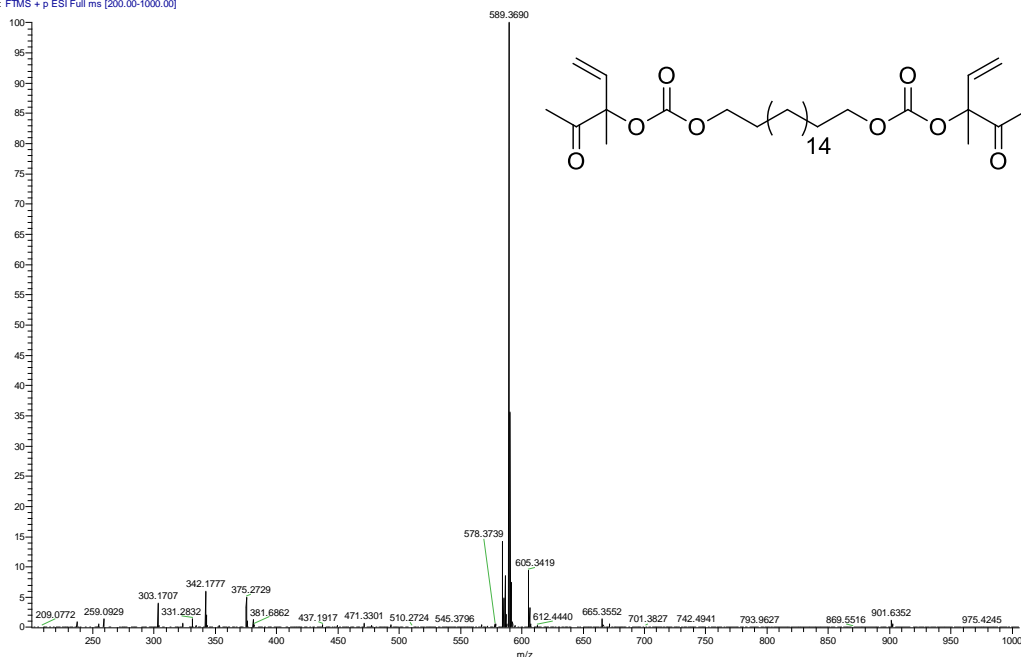

Figure S55. ESI MS spectrum of **4b**.

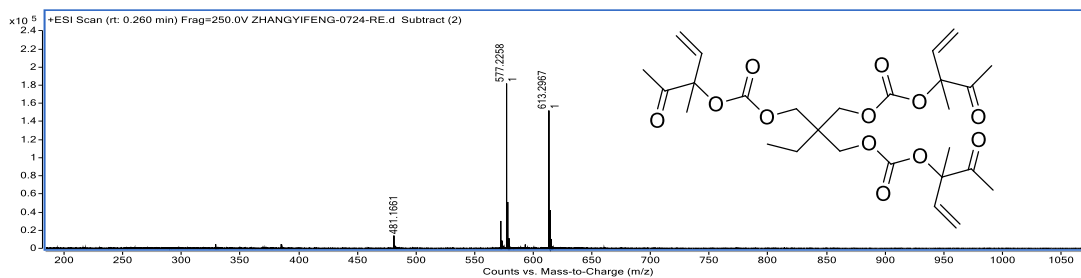

Figure S56. ESI MS spectrum of **4c**.

20210429-zvf #23-24 RT: 0.18-0.19 AV: 3 SB: 5 0.01-0.04 NL: 2.52E6  
T: FTMS + p ESI Full ms [120.00-800.00]

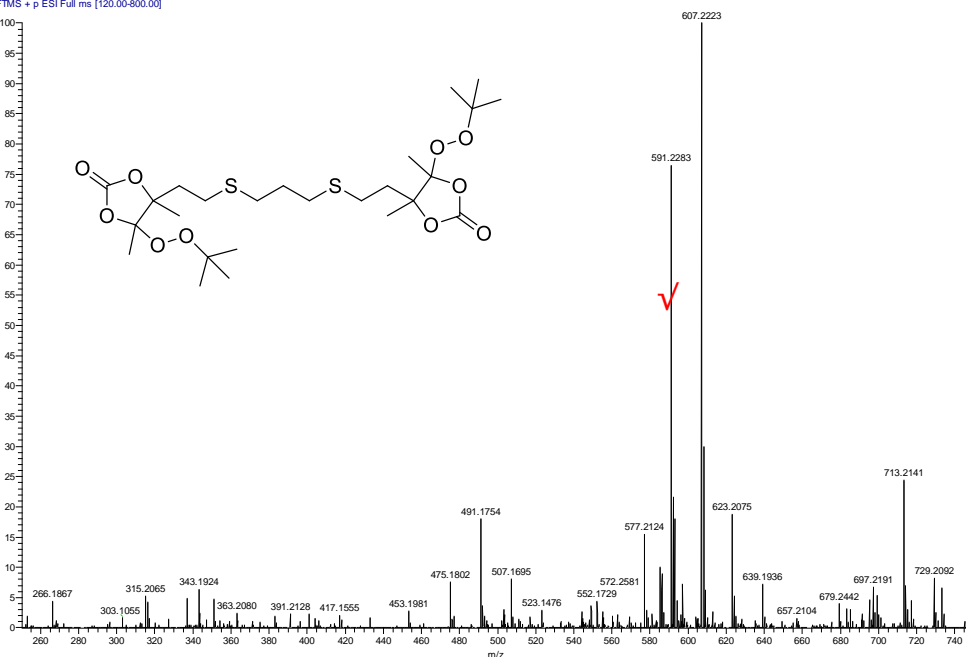

Figure S57. ESI MS spectrum of **7**.

### 10. Fluorescence spectra of the pure P4c5

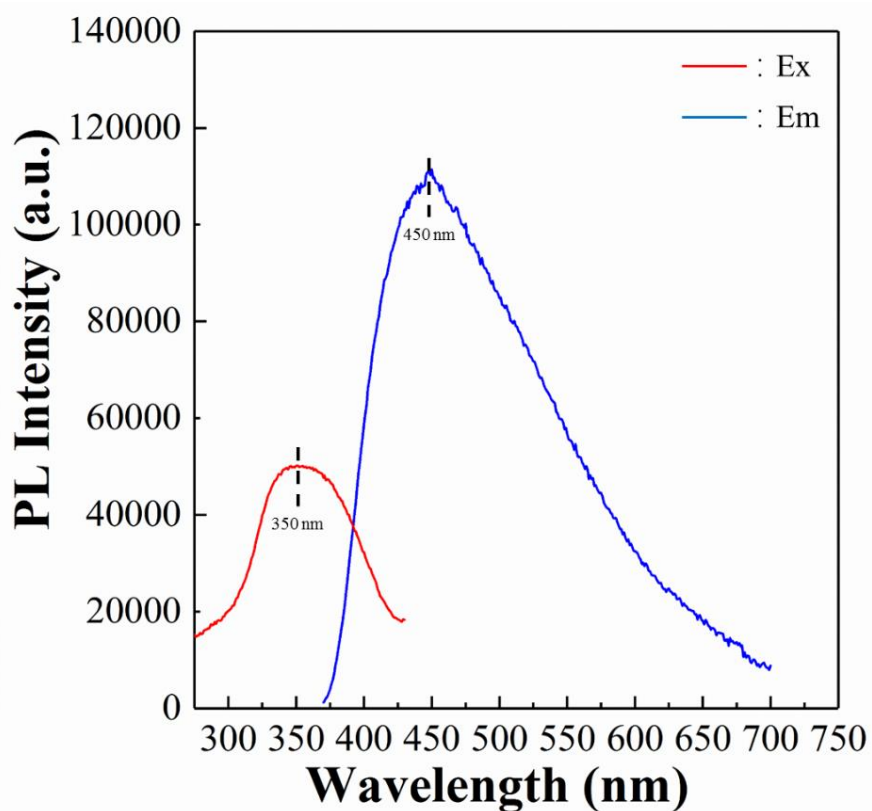

Figure S58. Fluorescence spectra of the pure P4c5a.

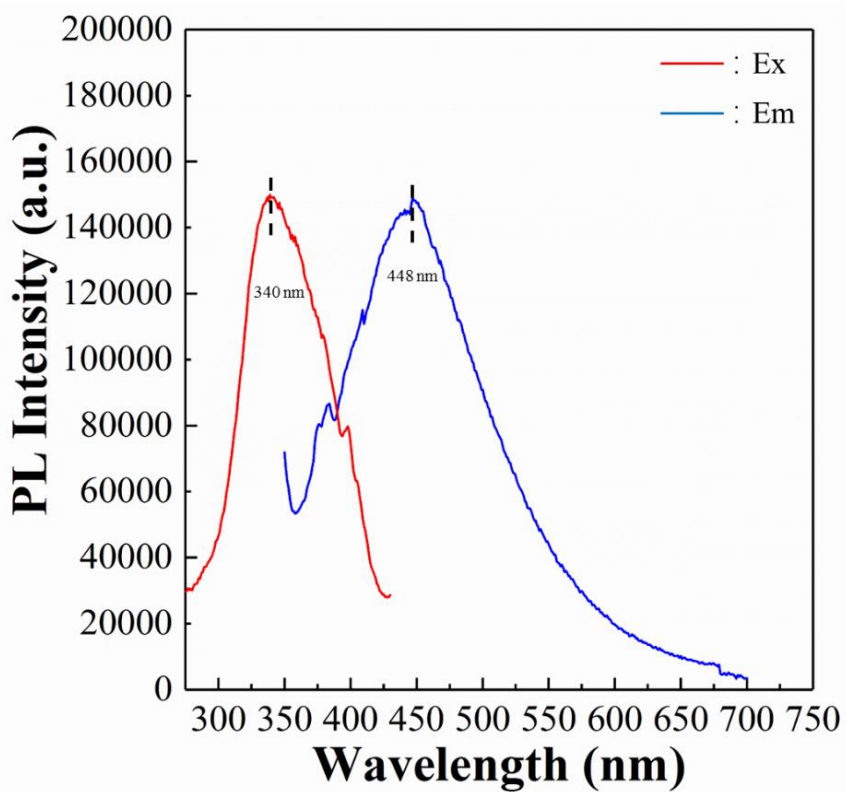

Figure S59. Fluorescence spectra of the pure P4c5b.

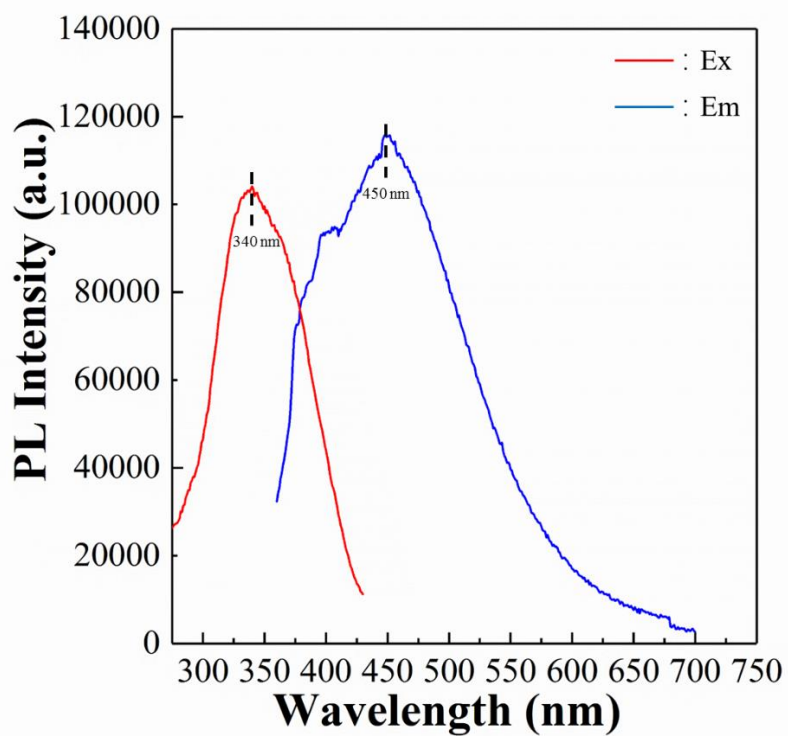

Figure S60. Fluorescence spectra of the pure P4c5c.

### 11. Transient photoluminescence decay curve of the pure P4c5

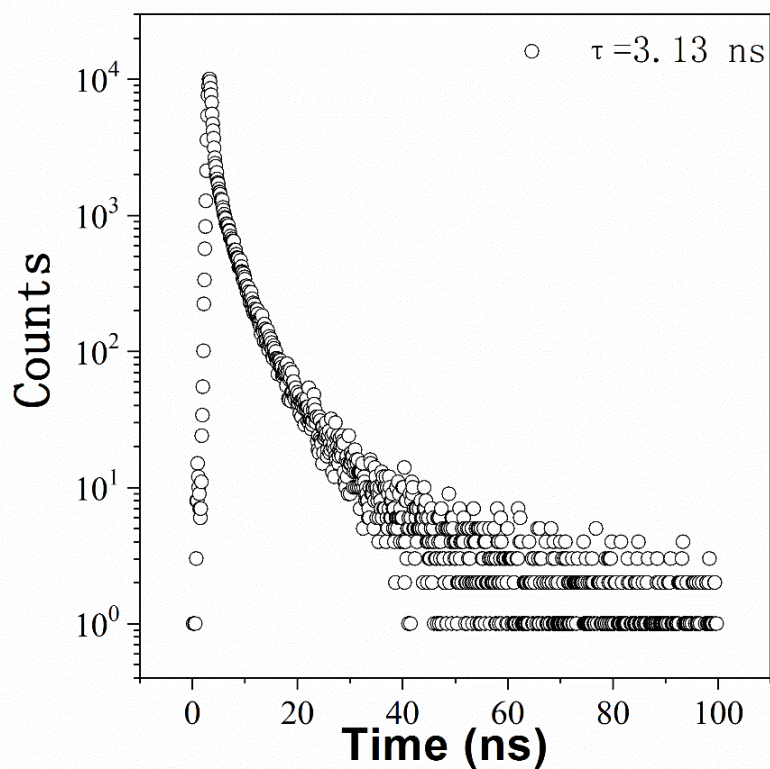

Figure S61. Transient photoluminescence decay curve of the pure P4c5a at 450 nm after excited at 350 nm

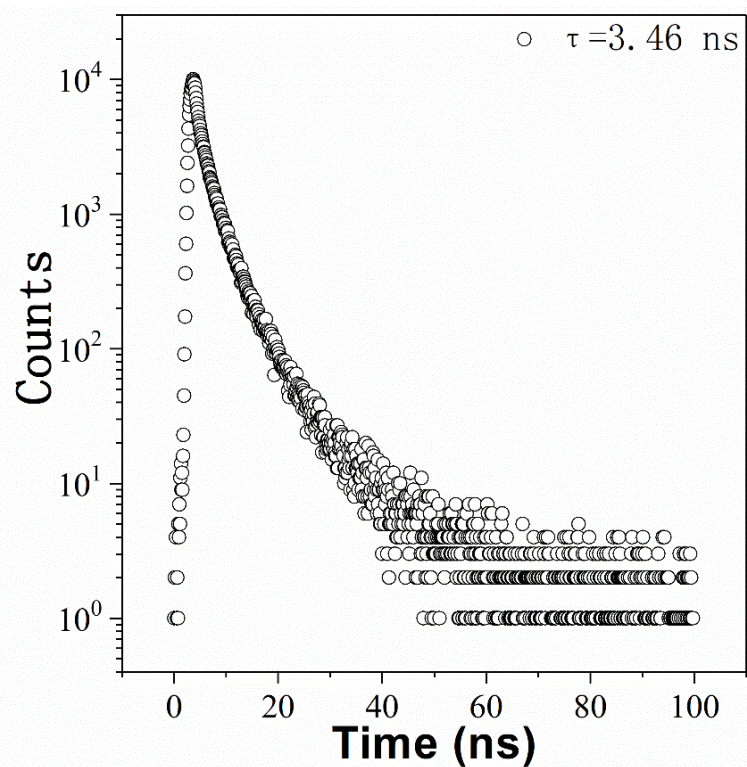

**Figure S62.** Transient photoluminescence decay curve of the pure **P4c5b** at 448 nm after excited at 340 nm

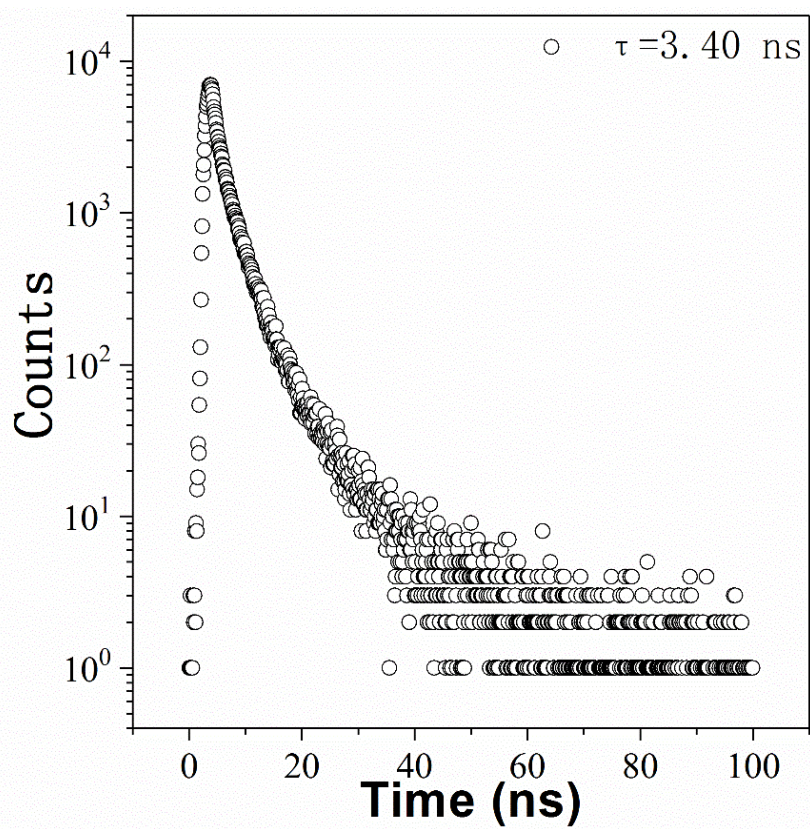

**Figure S63.** Transient photoluminescence decay curve of the pure **P4c5c** at 450 nm after excited at 340 nm

## 12. References

1. H. Zhou, H. Zhang, S. Mu, W.-Z. Zhang, W.-M. Ren and X.-B. Lu, *Green Chem.*, 2019, **21**, 6335–6341.
2. H. Zhou, Y.-F. Zhang, W. Chen, W.-Z. Zhang and X.-B. Lu, *Asian J. Org. Chem.*, 2021, DOI: 10.1002/ajoc.202100270.
3. M. Huler, M. Eck, D. Rothauer and S. Mecking, *Nature*, 2021, **590**, 423-427.
